# Supplementary material
Source: PubMed Central journal article supplement (PMC4039355)
Supplement: np401083g_si_001.pdf [file np401083g_si_001.pdf]

## **Supplemental Information for:**

### **Antimicrobial and Antiinsectan Phenolic Metabolites of *Dalea searlsiae***

Gil Belofsky,<sup>\*,†</sup> Mario Aronica,<sup>†</sup> Eric Foss,<sup>‡</sup> Jane Diamond,<sup>‡</sup> Felipe Santana,<sup>‡</sup> Jacob Farley,<sup>‡</sup> Patrick Dowd,<sup>§</sup> Christina Coleman<sup>⊥</sup> and Daneel Ferreira.<sup>⊥</sup>

<sup>†</sup>Department of Chemistry, Central Washington University, Ellensburg, WA 98926

<sup>‡</sup>Department of Biological Sciences, Central Washington University, Ellensburg, WA 98926

<sup>§</sup>Crop Bioprotection Research Unit, USDA-ARS, National Center for Agricultural Utilization Research, 1815 N. University St., Peoria, IL 61604

<sup>⊥</sup>Department of Pharmacognosy and the Research Institute of Pharmaceutical Sciences, School of Pharmacy, The University of Mississippi, University, MS 38677

\*Corresponding Author: Tel: 509-963-2882. Fax: 509-963-1050. Email: [belofskyg@cwu.edu](mailto:belofskyg@cwu.edu).

## **Contents**

| <b>page</b> | <b>description</b>                                                                                                                                              |
|-------------|-----------------------------------------------------------------------------------------------------------------------------------------------------------------|
| 4           | <b>Figure S1.</b> Experimental ECD spectrum of malheuran A ( <b>1</b> ).                                                                                        |
|             | <b>Figure S2.</b> Experimental ECD spectrum of malheuran B ( <b>2</b> ).                                                                                        |
| 5           | <b>Figure S3.</b> Experimental ECD spectrum of malheuran C ( <b>3</b> ).                                                                                        |
|             | <b>Figure S4.</b> Experimental ECD spectrum of malheuran D ( <b>4</b> ).                                                                                        |
| 6           | <b>Figure S5.</b> Experimental ECD spectrum of (2 <i>S</i> )-5'-(2-methylbut-3-en-2-yl)-8-(3-methylbut-2-en-1-yl)-5,7,2',4'-tetrahydroxyflavanone ( <b>5</b> ). |
|             | <b>Figure S6.</b> Experimental ECD spectrum of (-)-tephrosin ( <b>7</b> ).                                                                                      |
| 7           | <b>Figure S7.</b> Experimental ECD spectrum of (-)-millettosin A ( <b>8</b> ).                                                                                  |
| 8           | <b>Figure S8.</b> <sup>1</sup> H NMR spectrum of malheuran A ( <b>1</b> ) (400 MHz; acetone- <i>d</i> <sub>6</sub> ).                                           |
| 9           | <b>Figure S9.</b> <sup>13</sup> C NMR spectrum of malheuran A ( <b>1</b> ) (100 MHz; acetone- <i>d</i> <sub>6</sub> ).                                          |
| 10          | <b>Figure S10.</b> HSQC spectrum of malheuran A ( <b>1</b> ) (400 MHz; acetone- <i>d</i> <sub>6</sub> ).                                                        |
| 11          | <b>Figure S11.</b> HMBC spectrum of malheuran A ( <b>1</b> ) (400 MHz; acetone- <i>d</i> <sub>6</sub> ).                                                        |
| 12          | <b>Figure S12.</b> <sup>1</sup> H NMR spectrum of malheuran B ( <b>2</b> ) (400 MHz; acetone- <i>d</i> <sub>6</sub> ).                                          |
| 13          | <b>Figure S13.</b> <sup>13</sup> C NMR spectrum of malheuran B ( <b>2</b> ) (100 MHz; acetone- <i>d</i> <sub>6</sub> ).                                         |
| 14          | <b>Figure S14.</b> HSQC spectrum of malheuran B ( <b>2</b> ) (400 MHz; acetone- <i>d</i> <sub>6</sub> ).                                                        |
| 15          | <b>Figure S15.</b> HMBC spectrum of malheuran B ( <b>2</b> ) (400 MHz; acetone- <i>d</i> <sub>6</sub> ).                                                        |
| 16          | <b>Figure S16.</b> <sup>1</sup> H NMR spectrum of malheuran C ( <b>3</b> ) (400 MHz; acetone- <i>d</i> <sub>6</sub> ).                                          |

Contents, cont.

| page | description                                                                                                                                                                                    |
|------|------------------------------------------------------------------------------------------------------------------------------------------------------------------------------------------------|
| 17   | <b>Figure S17.</b> $^{13}\text{C}$ NMR spectrum of malheuran C ( <b>3</b> ) (100 MHz; acetone- $d_6$ ).                                                                                        |
| 18   | <b>Figure S18.</b> HSQC spectrum of malheuran C ( <b>3</b> ) (400 MHz; acetone- $d_6$ ).                                                                                                       |
| 19   | <b>Figure S19.</b> HMBC spectrum of malheuran C ( <b>3</b> ) (400 MHz; acetone- $d_6$ ).                                                                                                       |
| 20   | <b>Figure S20.</b> $^1\text{H}$ NMR spectrum of malheuran D ( <b>4</b> ) (400 MHz; acetone- $d_6$ ).                                                                                           |
| 21   | <b>Figure S21.</b> $^{13}\text{C}$ NMR spectrum of malheuran D ( <b>4</b> ) (100 MHz; acetone- $d_6$ ).                                                                                        |
| 22   | <b>Figure S22.</b> HSQC spectrum of malheuran D ( <b>4</b> ) (400 MHz; acetone- $d_6$ ).                                                                                                       |
| 23   | <b>Figure S23.</b> HMBC spectrum of malheuran D ( <b>4</b> ) (400 MHz; acetone- $d_6$ ).                                                                                                       |
| 24   | <b>Figure S24.</b> $^1\text{H}$ NMR spectrum of (2 <i>S</i> )-5'-(2-methylbut-3-en-2-yl)-8-(3-methylbut-2-en-1-yl)-5,7,2',4'-tetrahydroxyflavanone ( <b>5</b> ) (400 MHz; acetone- $d_6$ ).    |
| 25   | <b>Figure S25.</b> $^{13}\text{C}$ NMR spectrum of (2 <i>S</i> )-5'-(2-methylbut-3-en-2-yl)-8-(3-methylbut-2-en-1-yl)-5,7,2',4'-tetrahydroxyflavanone ( <b>5</b> ) (100 MHz; acetone- $d_6$ ). |
| 26   | <b>Figure S26.</b> HSQC spectrum of (2 <i>S</i> )-5'-(2-methylbut-3-en-2-yl)-8-(3-methylbut-2-en-1-yl)-5,7,2',4'-tetrahydroxyflavanone ( <b>5</b> ) (400 MHz; acetone- $d_6$ ).                |
| 27   | <b>Figure S27.</b> HMBC spectrum of (2 <i>S</i> )-5'-(2-methylbut-3-en-2-yl)-8-(3-methylbut-2-en-1-yl)-5,7,2',4'-tetrahydroxyflavanone ( <b>5</b> ) (400 MHz; acetone- $d_6$ ).                |
| 28   | <b>Figure S28.</b> $^1\text{H}$ NMR spectrum of prostratol F ( <b>6</b> ) (400 MHz; acetone- $d_6$ ).                                                                                          |
| 29   | <b>Figure S29.</b> $^{13}\text{C}$ NMR spectrum of prostratol F ( <b>6</b> ) (100 MHz; acetone- $d_6$ ).                                                                                       |
| 30   | <b>Figure S30.</b> DEPT135 spectrum of prostratol F ( <b>6</b> ) (100 MHz; acetone- $d_6$ ).                                                                                                   |
| 31   | <b>Figure S31.</b> DEPT90 spectrum of prostratol F ( <b>6</b> ) (100 MHz; acetone- $d_6$ ).                                                                                                    |
| 32   | <b>Figure S32.</b> COSY spectrum of prostratol F ( <b>6</b> ) (400 MHz; acetone- $d_6$ ).                                                                                                      |
| 33   | <b>Figure S33.</b> $^1\text{H}$ NMR spectrum of (-)-tephrosin ( <b>7</b> ) (400 MHz; acetone- $d_6$ ).                                                                                         |
| 34   | <b>Figure S34.</b> $^{13}\text{C}$ NMR spectrum of (-)-tephrosin ( <b>7</b> ) (100 MHz; acetone- $d_6$ ).                                                                                      |
| 35   | <b>Figure S35.</b> HSQC spectrum of (-)-tephrosin ( <b>7</b> ) (400 MHz; acetone- $d_6$ ).                                                                                                     |
| 36   | <b>Figure S36.</b> HMBC spectrum of (-)-tephrosin ( <b>7</b> ) (400 MHz; acetone- $d_6$ ).                                                                                                     |
| 37   | <b>Figure S37.</b> $^1\text{H}$ NMR spectrum of (-)-millettosin ( <b>8</b> ) (400 MHz; acetone- $d_6$ ).                                                                                       |
| 38   | <b>Figure S38.</b> $^{13}\text{C}$ NMR spectrum of (-)-millettosin ( <b>8</b> ) (100 MHz; acetone- $d_6$ ).                                                                                    |
| 39   | <b>Figure S39.</b> HSQC spectrum of (-)-millettosin ( <b>8</b> ) (400 MHz; acetone- $d_6$ ).                                                                                                   |
| 40   | <b>Figure S40.</b> HMBC spectrum of (-)-millettosin ( <b>8</b> ) (400 MHz; acetone- $d_6$ ).                                                                                                   |
| 41   | <b>Figure S41.</b> $^1\text{H}$ NMR spectrum of griffonianone E ( <b>9</b> ) (400 MHz; acetone- $d_6$ ).                                                                                       |
| 42   | <b>Figure S42.</b> $^{13}\text{C}$ NMR spectrum of griffonianone E ( <b>9</b> ) (100 MHz; acetone- $d_6$ ).                                                                                    |

**Contents, cont.**

| <b>page</b> | <b>description</b>                                                                                                                     |
|-------------|----------------------------------------------------------------------------------------------------------------------------------------|
| 43          | <b>Figure S43.</b> HSQC spectrum of griffonianone E ( <b>9</b> ) (400 MHz; acetone- <i>d</i> <sub>6</sub> ).                           |
| 44          | <b>Figure S44.</b> HMBC spectrum of griffonianone E ( <b>9</b> ) (400 MHz; acetone- <i>d</i> <sub>6</sub> ).                           |
| 45          | <b>Figure S45.</b> <sup>1</sup> H NMR spectrum of calopogonium isoflavone A ( <b>10</b> ) (400 MHz; acetone- <i>d</i> <sub>6</sub> ).  |
| 46          | <b>Figure S46.</b> <sup>13</sup> C NMR spectrum of calopogonium isoflavone A ( <b>10</b> ) (100 MHz; acetone- <i>d</i> <sub>6</sub> ). |
| 47          | <b>Figure S47.</b> HSQC spectrum of calopogonium isoflavone A ( <b>10</b> ) (400 MHz; acetone- <i>d</i> <sub>6</sub> ).                |
| 48          | <b>Figure S48.</b> HMBC spectrum of calopogonium isoflavone A ( <b>10</b> ) (400 MHz; acetone- <i>d</i> <sub>6</sub> ).                |

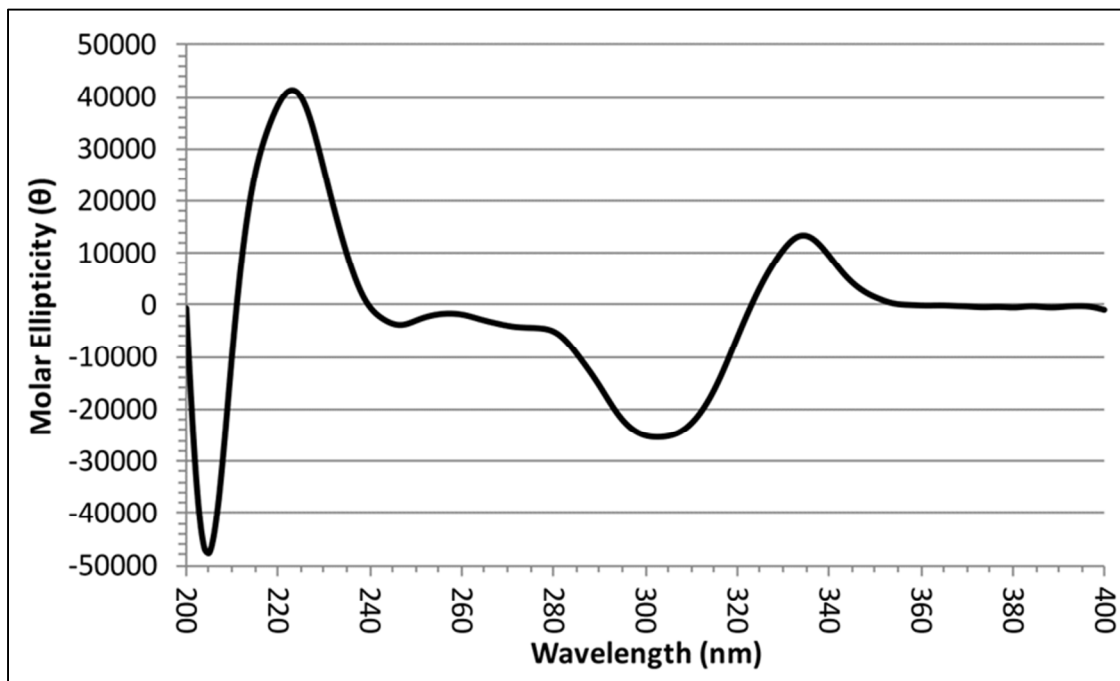

**Figure S1.** Experimental ECD spectrum of malheuran A (1).

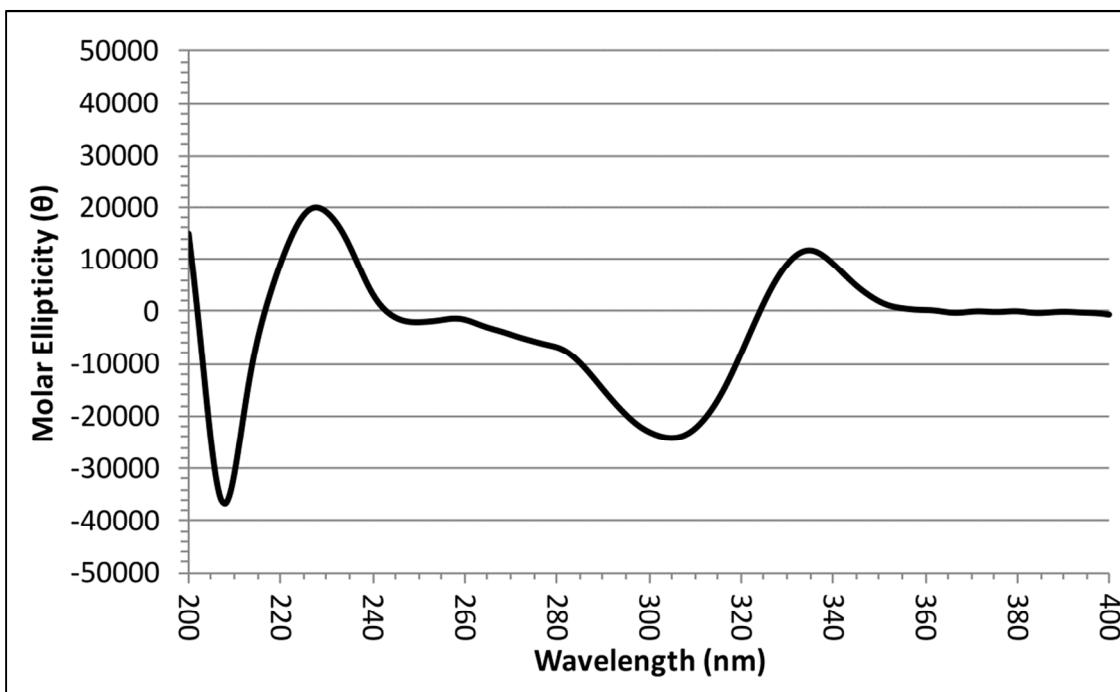

**Figure S2.** Experimental ECD spectrum of malheuran B (2).

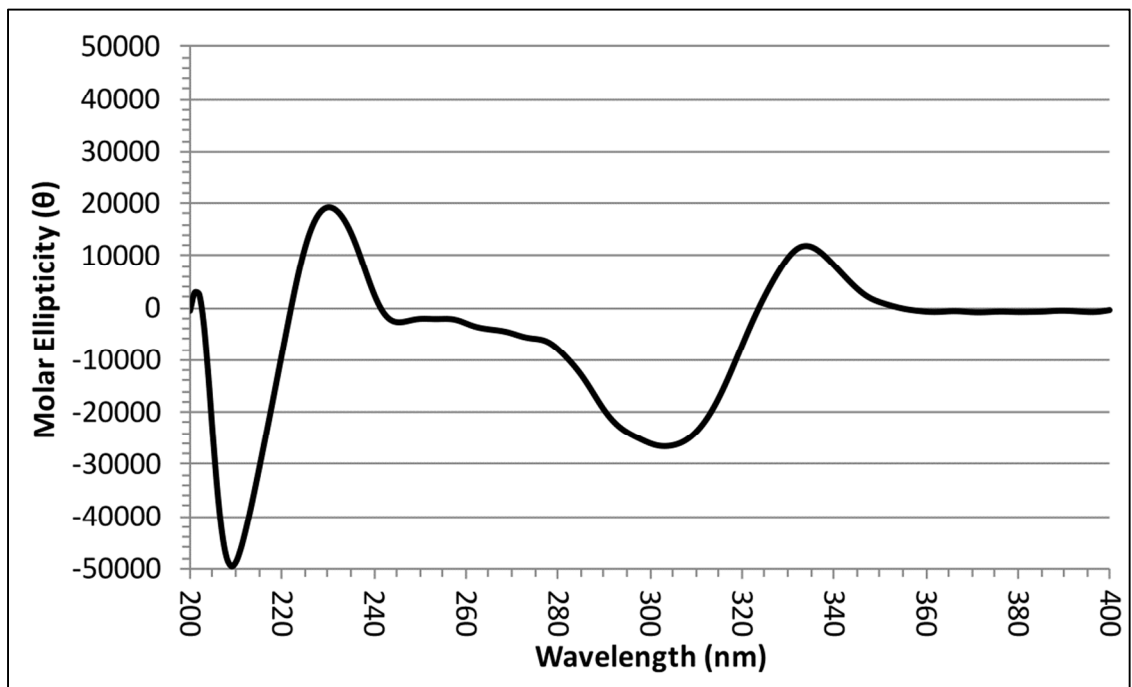

**Figure S3.** Experimental ECD spectrum of malheuran C (3).

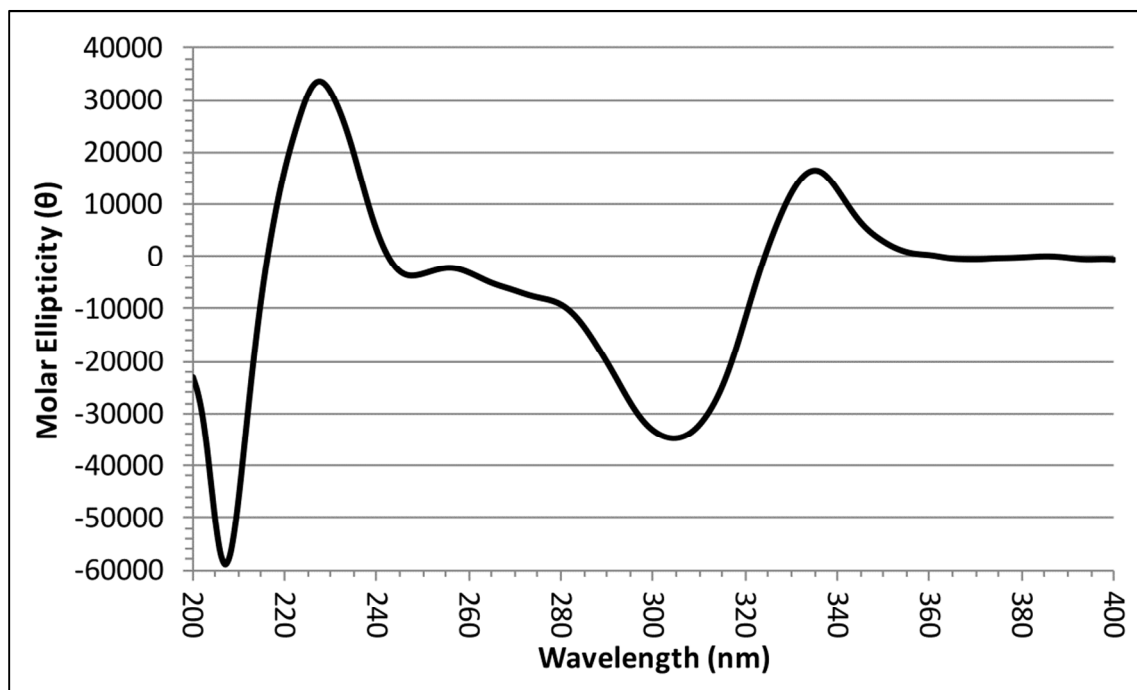

**Figure S4.** Experimental ECD spectrum of malheuran D (4).

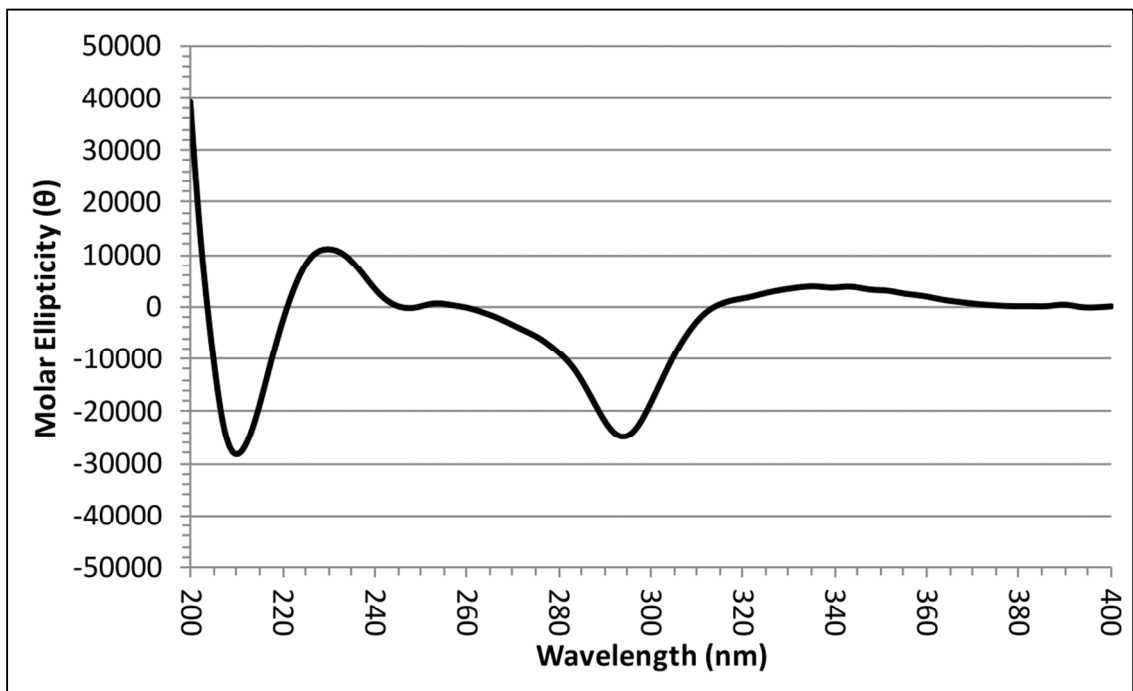

**Figure S5.** Experimental ECD spectrum of (2*S*)-5'-(2-methylbut-3-en-2-yl)-8-(3-methylbut-2-en-1-yl)-5,7,2',4'-tetrahydroflavanone (**5**).

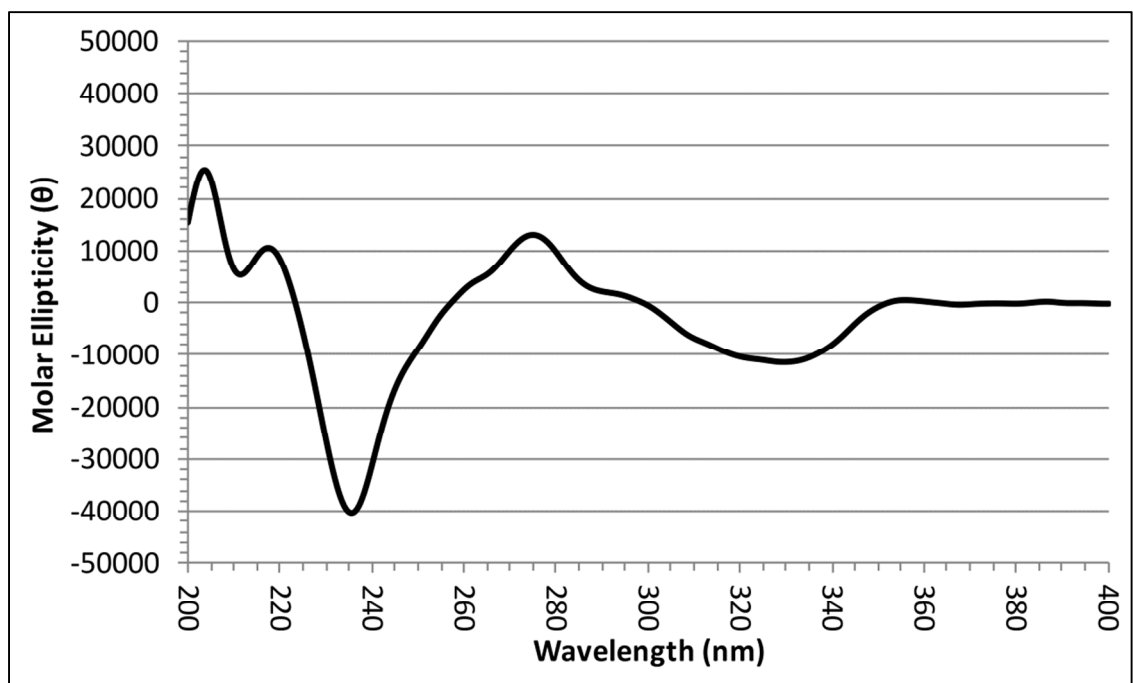

**Figure S6.** Experimental ECD spectrum of (-)-tephrosin (**7**).

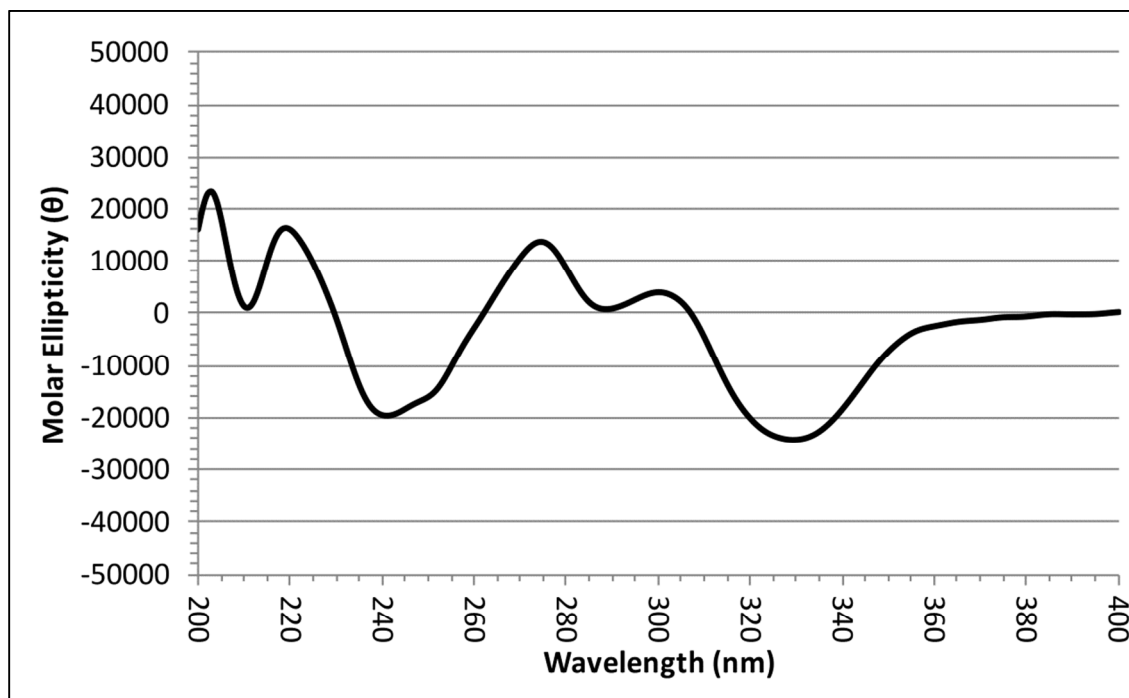

**Figure S7.** Experimental ECD spectrum of (-)-milletosin A (**8**).

"MA-1-48-F3, 1H, acetone-d6" 1 1 /opt/home/belofskyg Dalea searisiae

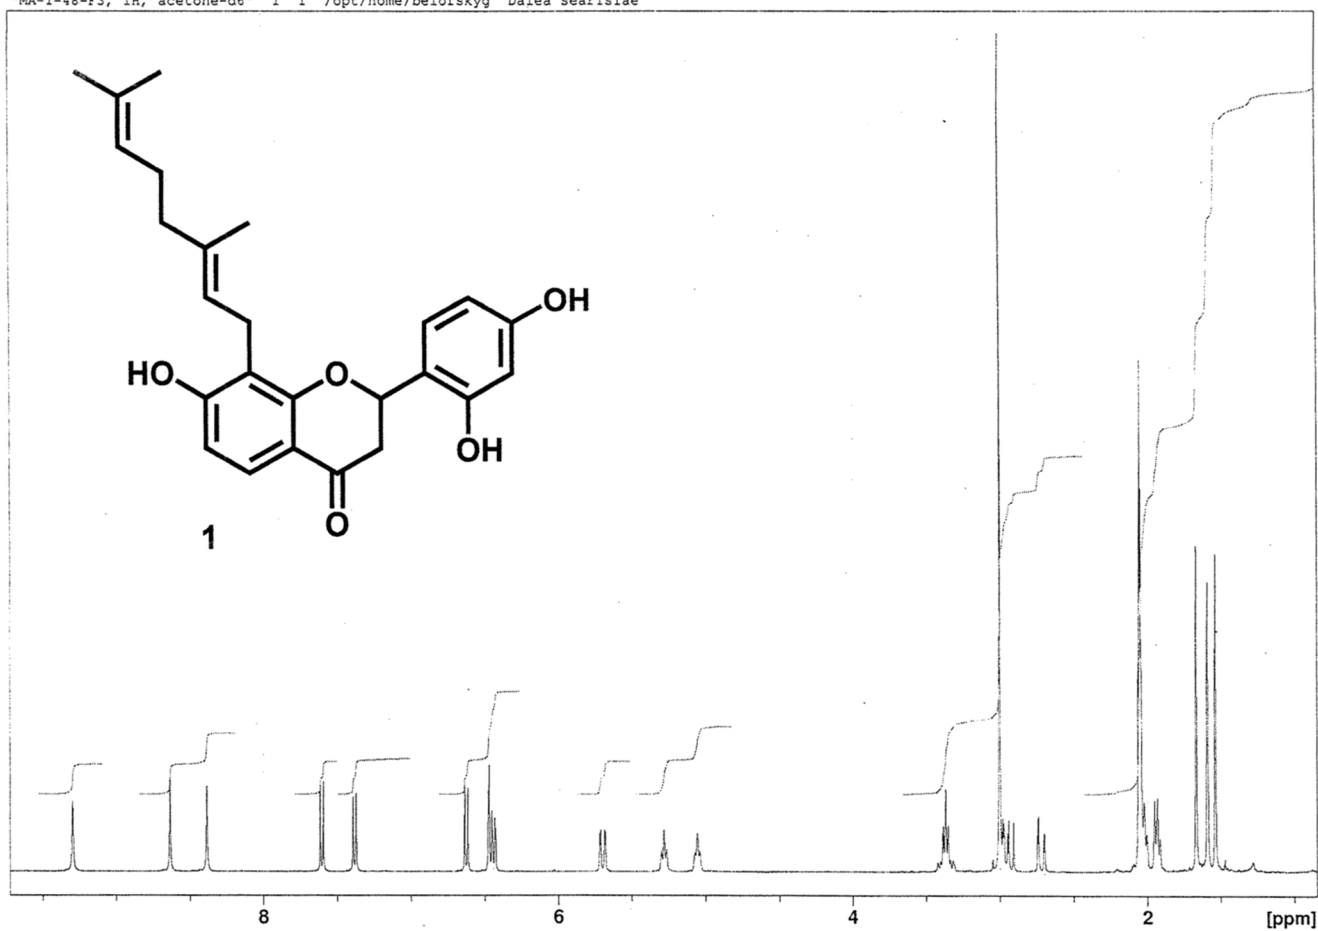

**Figure S8.** <sup>1</sup>H NMR spectrum of malheuran A (**1**) (400 MHz; acetone-*d*<sub>6</sub>).



"MA-1-48-F3, 13C, acetone-d6" 1 1 /opt/home/belofskyg Dalea searlsiae

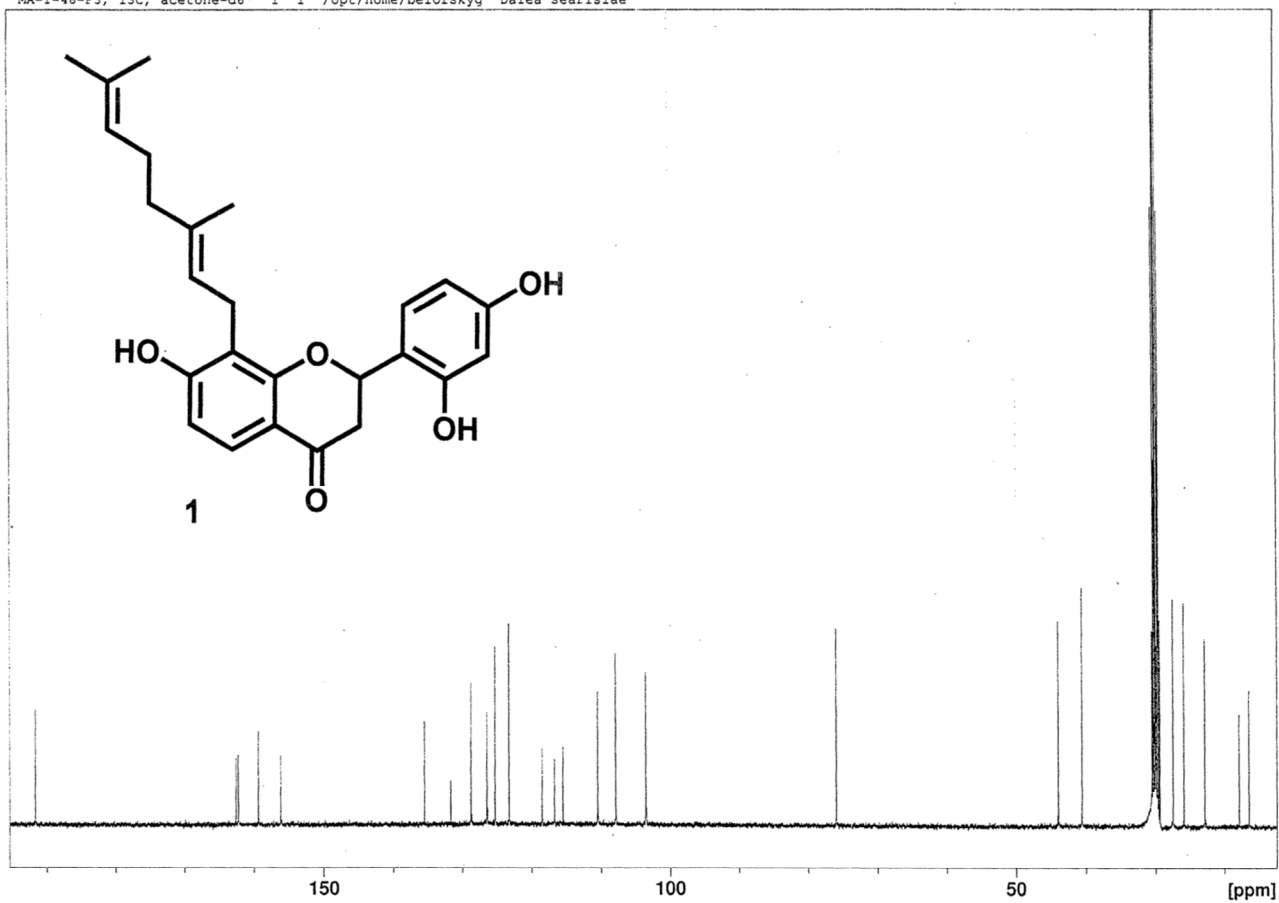

Figure S9. <sup>13</sup>C NMR spectrum of malheuran A (1) (100 MHz; acetone-*d*<sub>6</sub>).

"MA-1-48-F3, acetone-d6" 3 1 /opt/home/belofskyg Dalea searlsiae

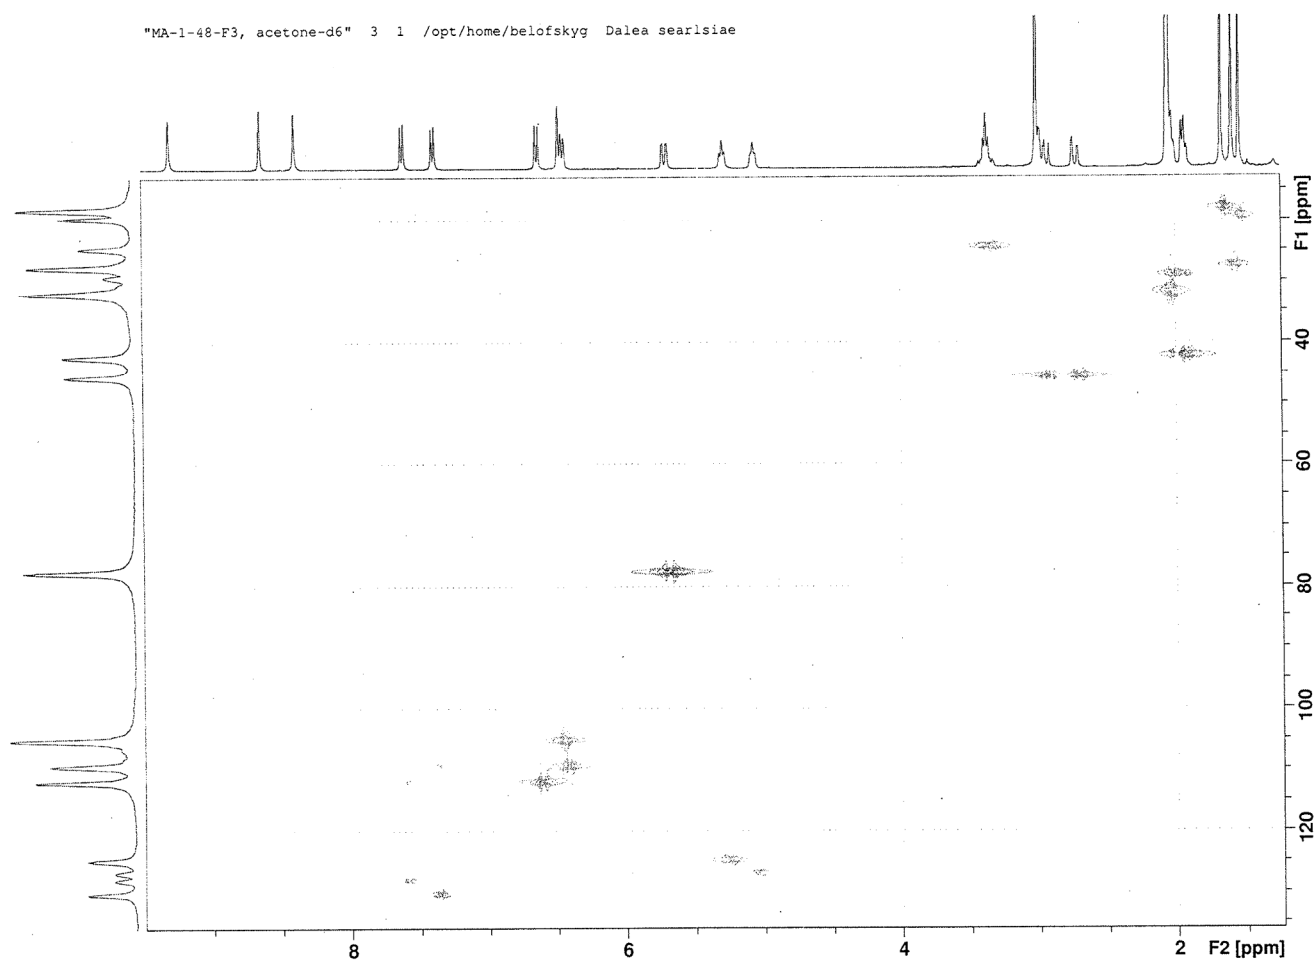

**Figure S10.** HSQC spectrum of malheuran A (**1**) (400 MHz; acetone- $d_6$ ).

"MA-1-48-F3, acetone-d6" 4 1 /opt/home/belofskyg Dalea searlsiae

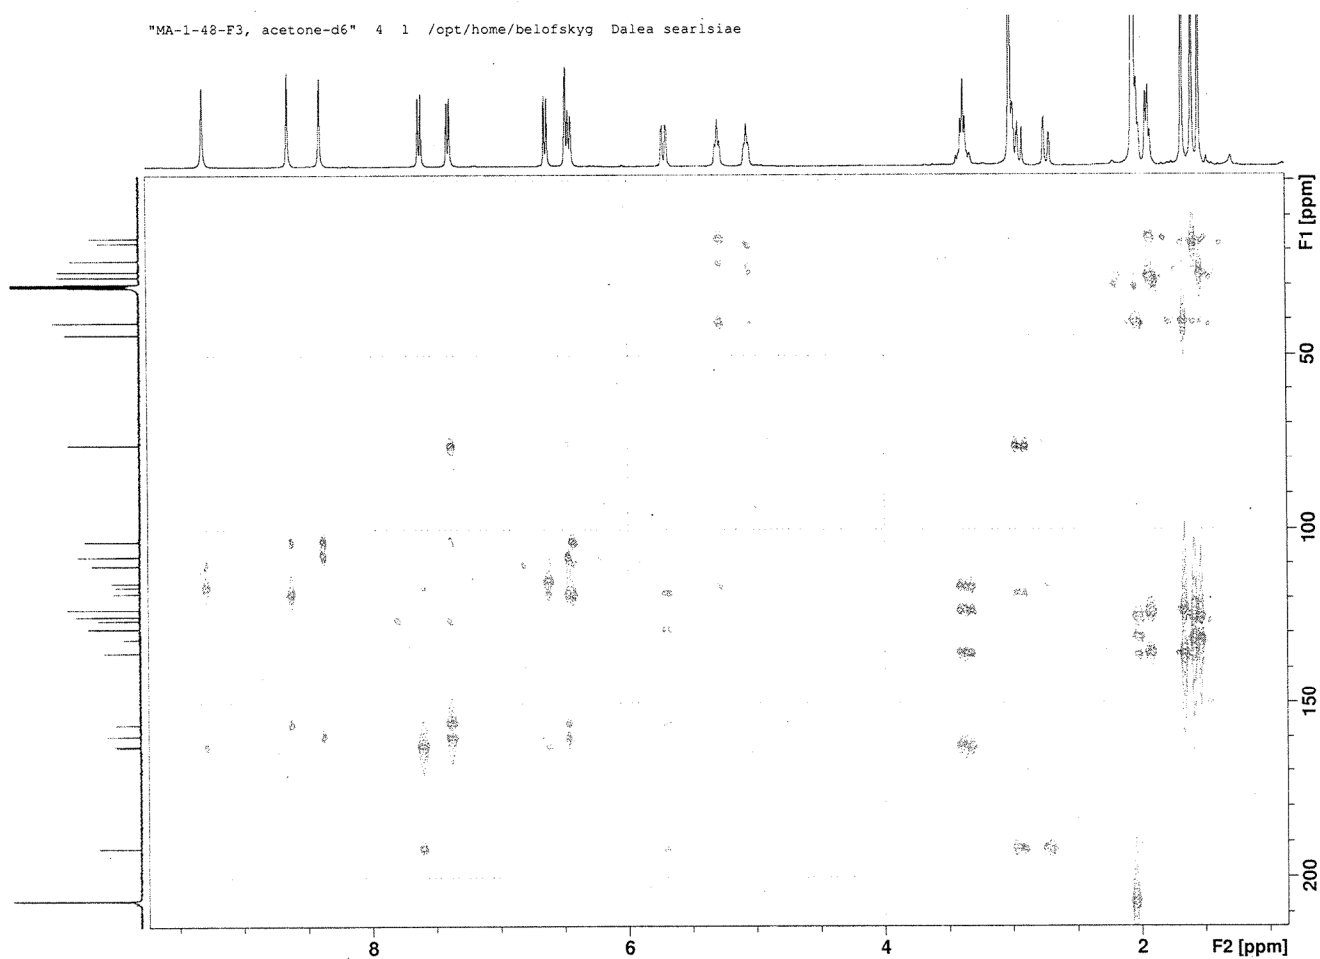

**Figure S11.** HMBC spectrum of malheuran A (**1**) (400 MHz; acetone- $d_6$ ).

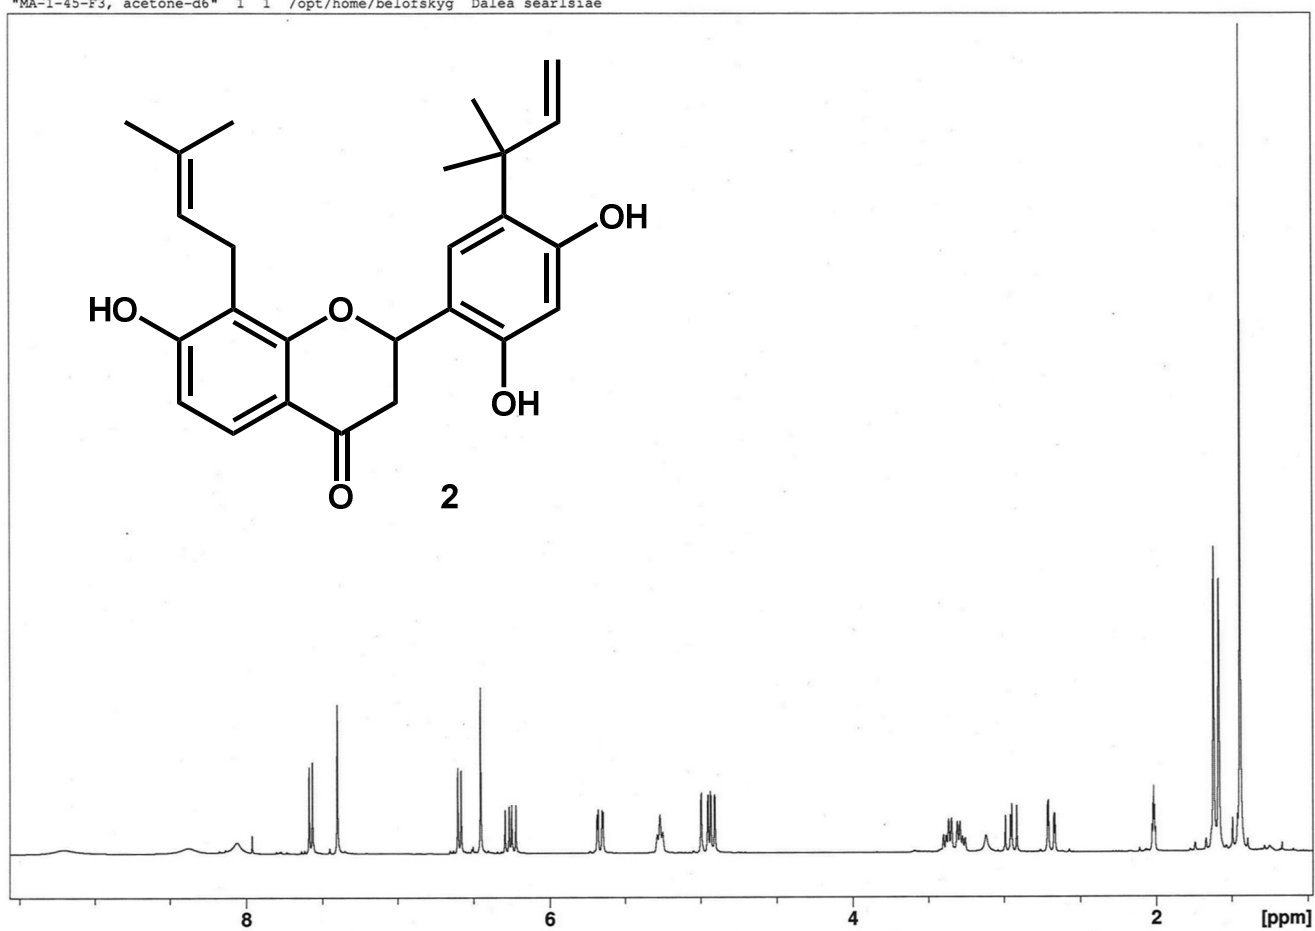

**Figure S12.**  $^1\text{H}$  NMR spectrum of malheuran B (2) (400 MHz; acetone- $d_6$ ).

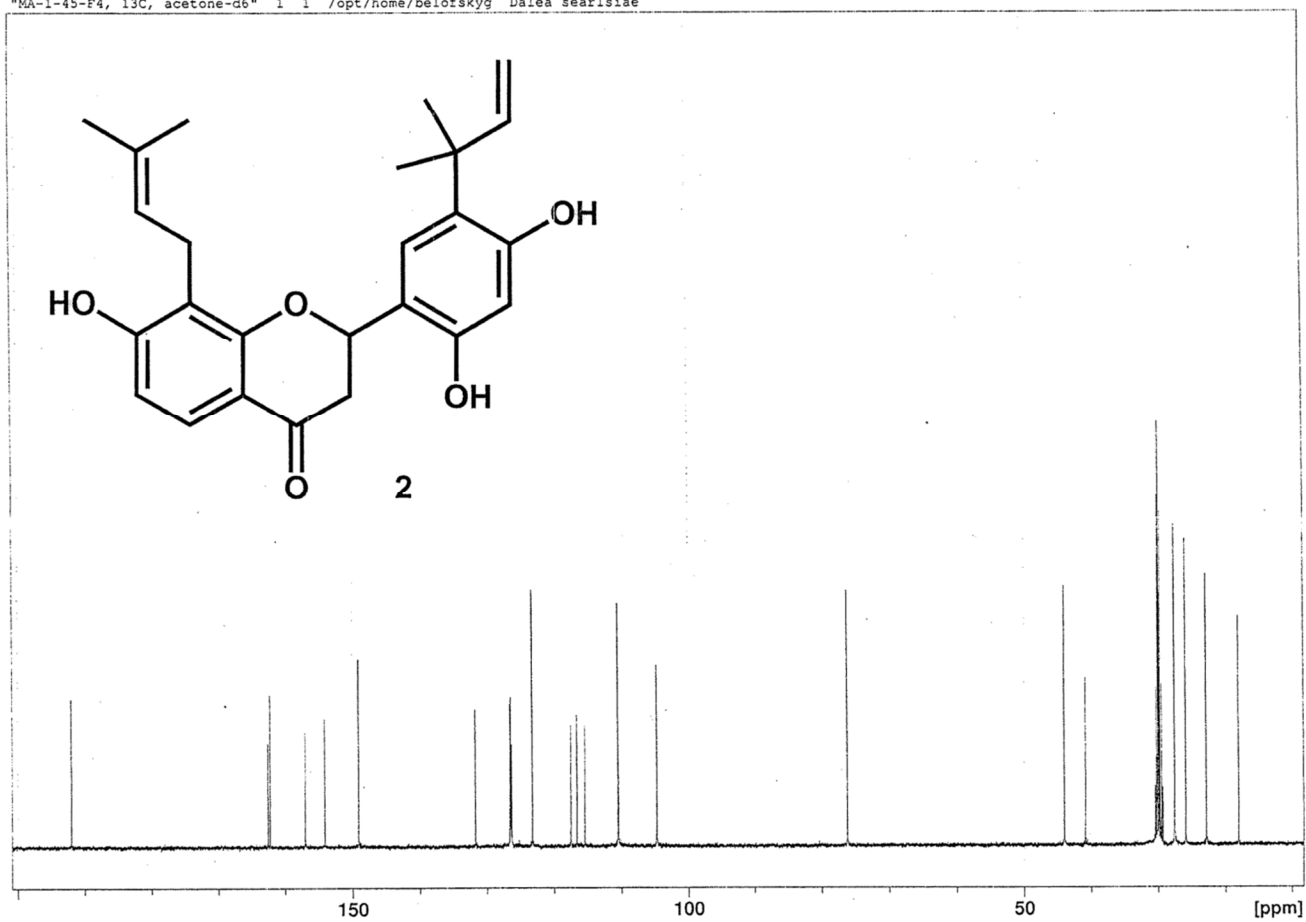

Figure S13. <sup>13</sup>C NMR spectrum of malheuran B (2) (100 MHz; acetone-*d*<sub>6</sub>).

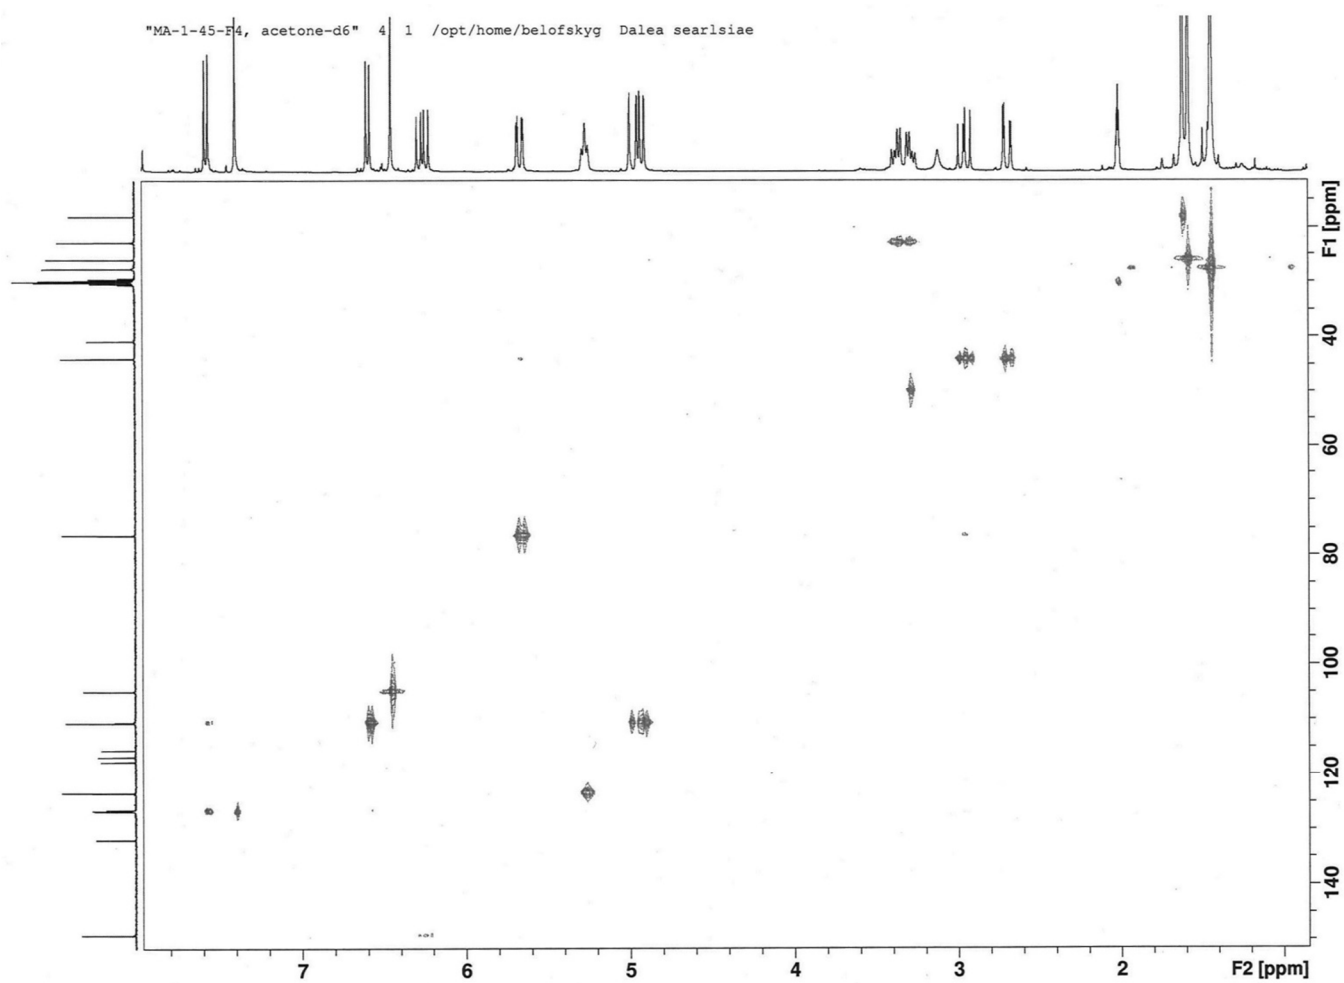

**Figure S14.** HSQC spectrum of malheuran B (**2**) (400 MHz; acetone- $d_6$ ).

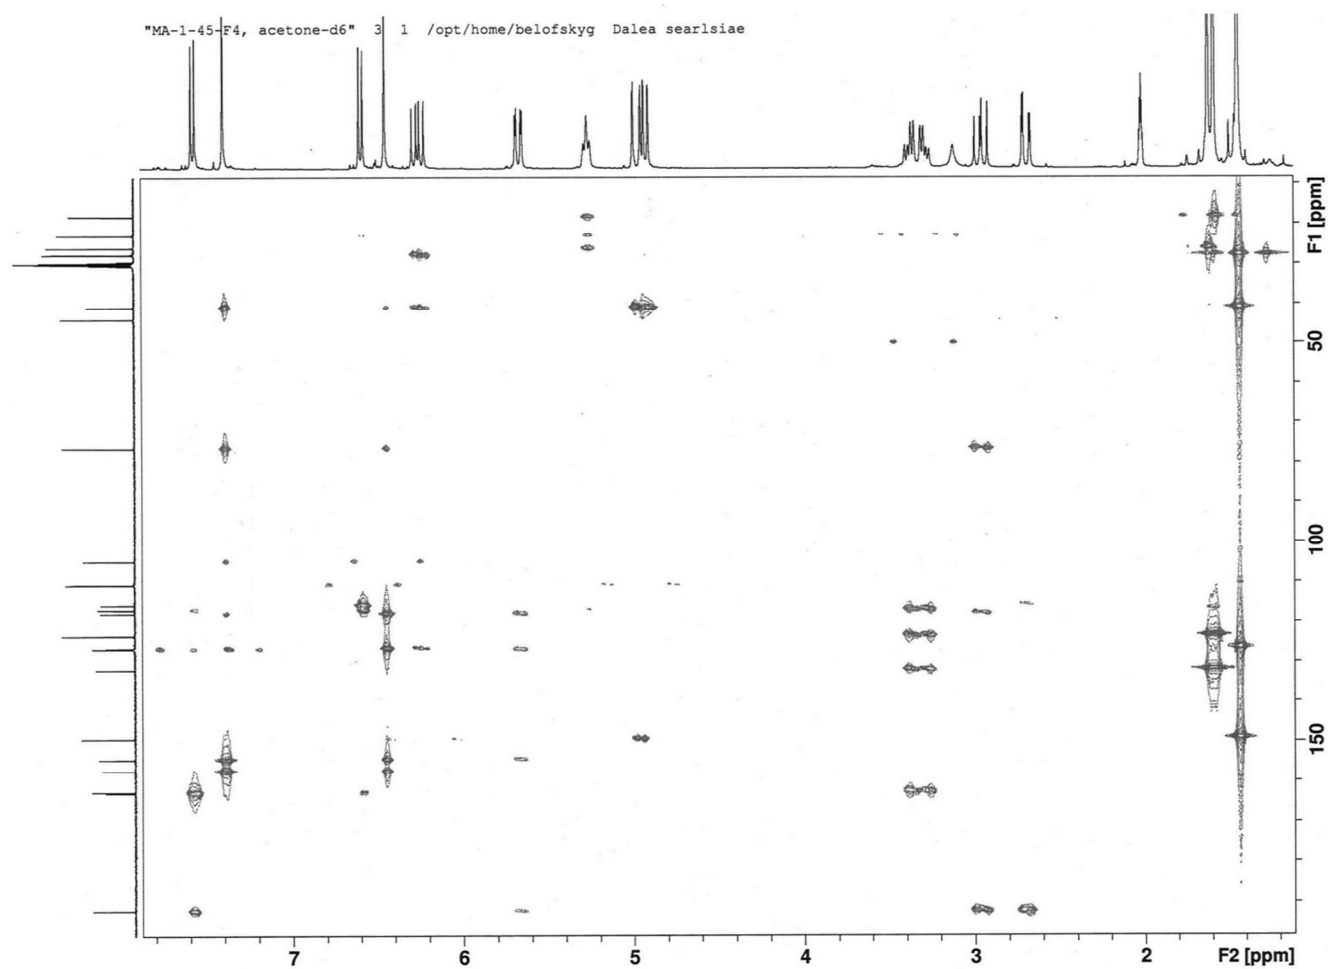

**Figure S15.** HMBC spectrum of malheuran B (**2**) (400 MHz; acetone- $d_6$ ).

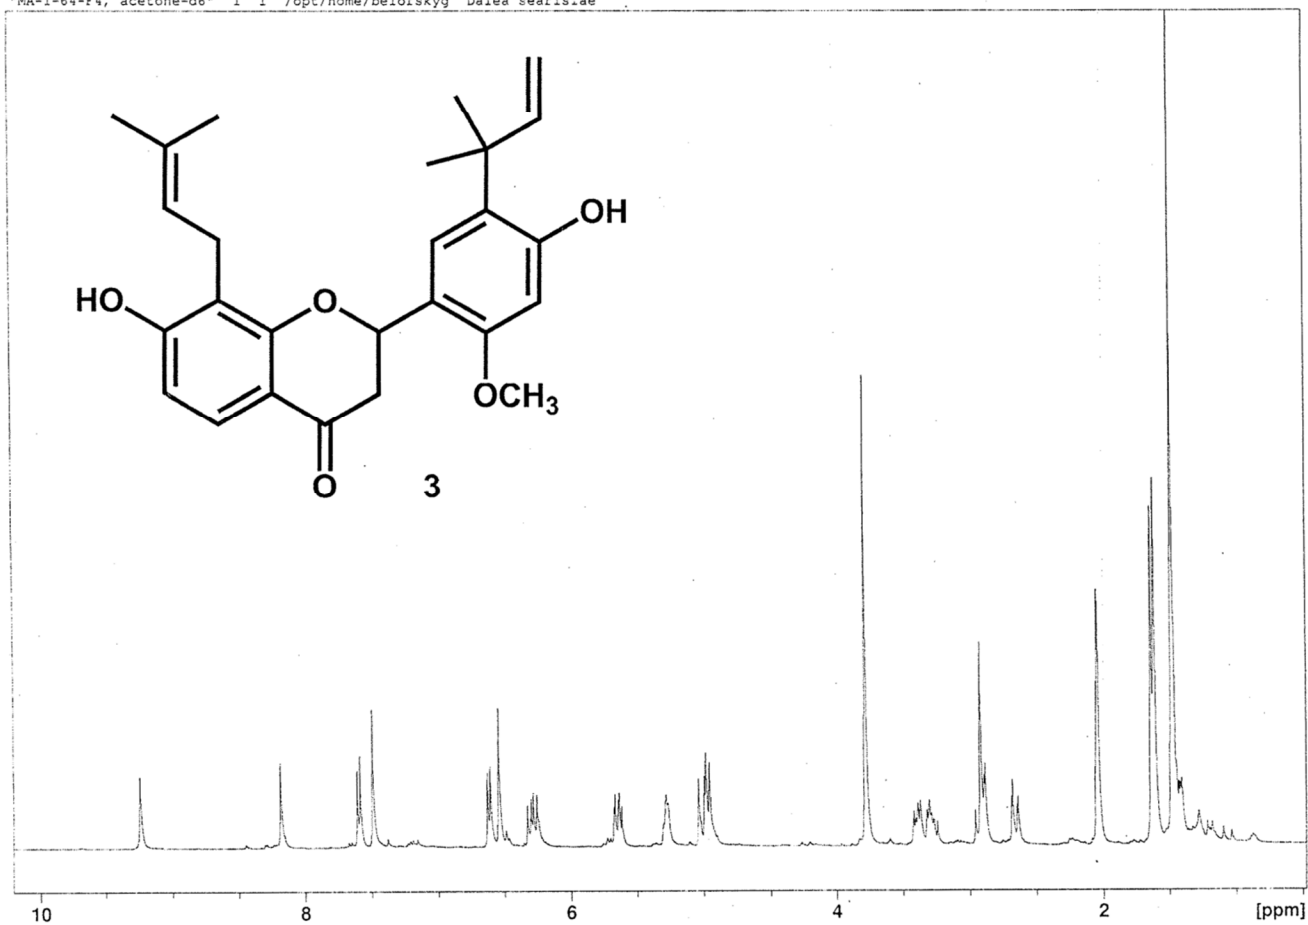

**Figure S16.** <sup>1</sup>H NMR spectrum of malheuran C (**3**) (400 MHz; acetone-*d*<sub>6</sub>).



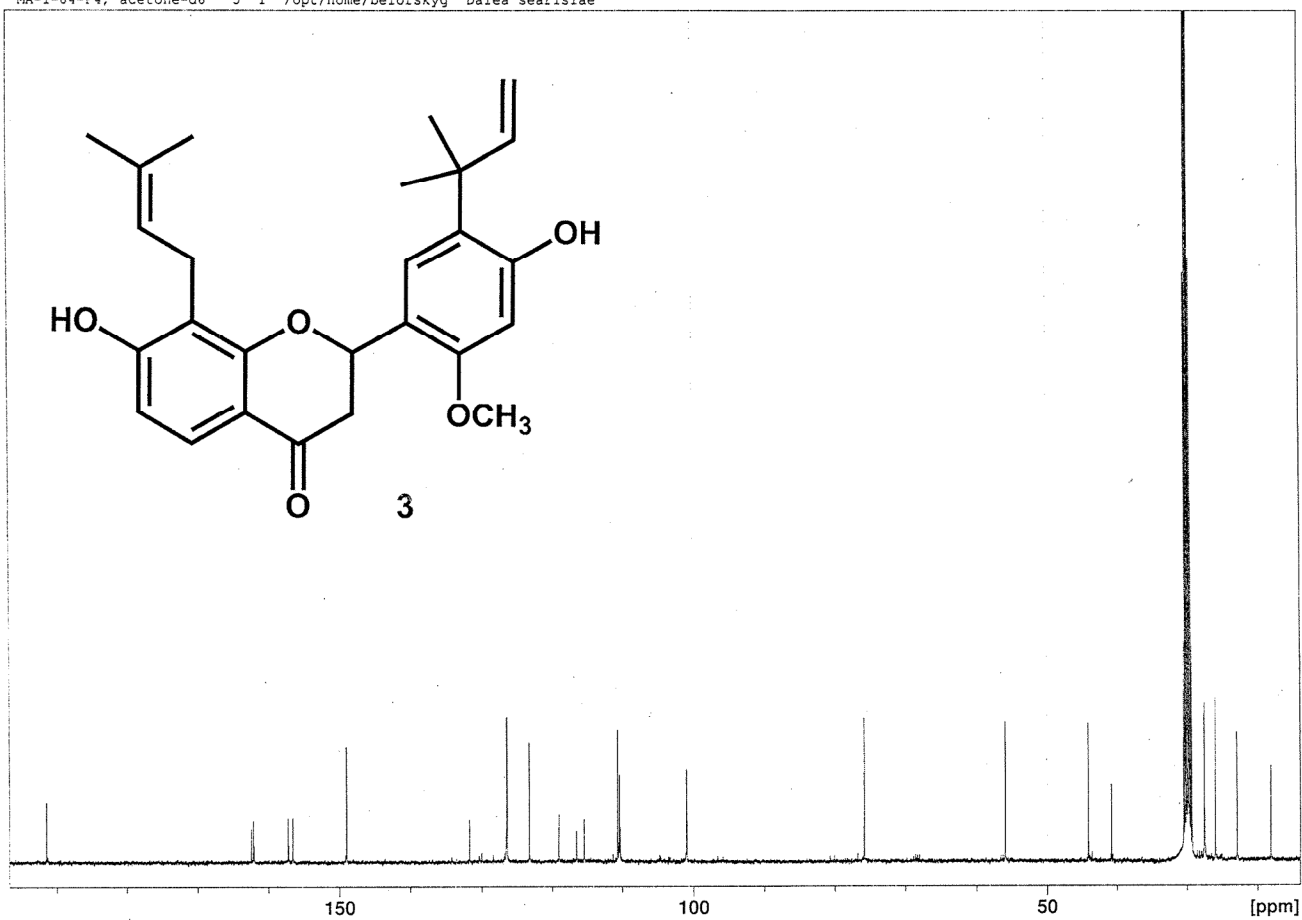

Figure S17.  $^{13}\text{C}$  NMR spectrum of malheuran C (**3**) (100 MHz; acetone- $d_6$ ).

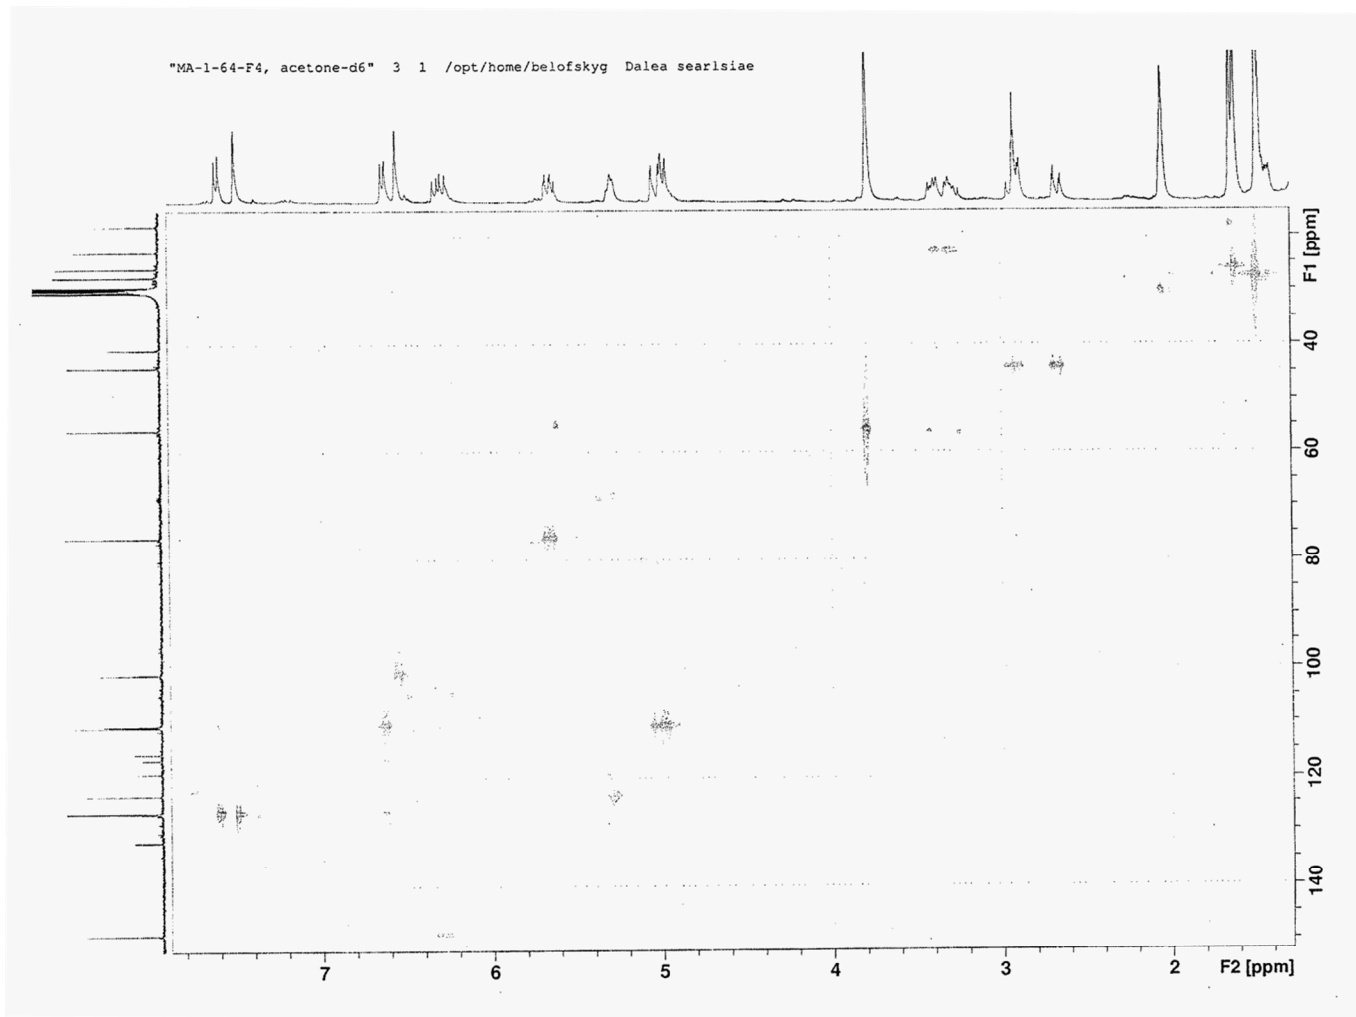

**Figure S18.** HSQC spectrum of malheuran C (**3**) (400 MHz; acetone- $d_6$ ).

"MA-1-64-F4, acetone-d6" 4 1 /opt/home/belofskyg Dalea searlsiae

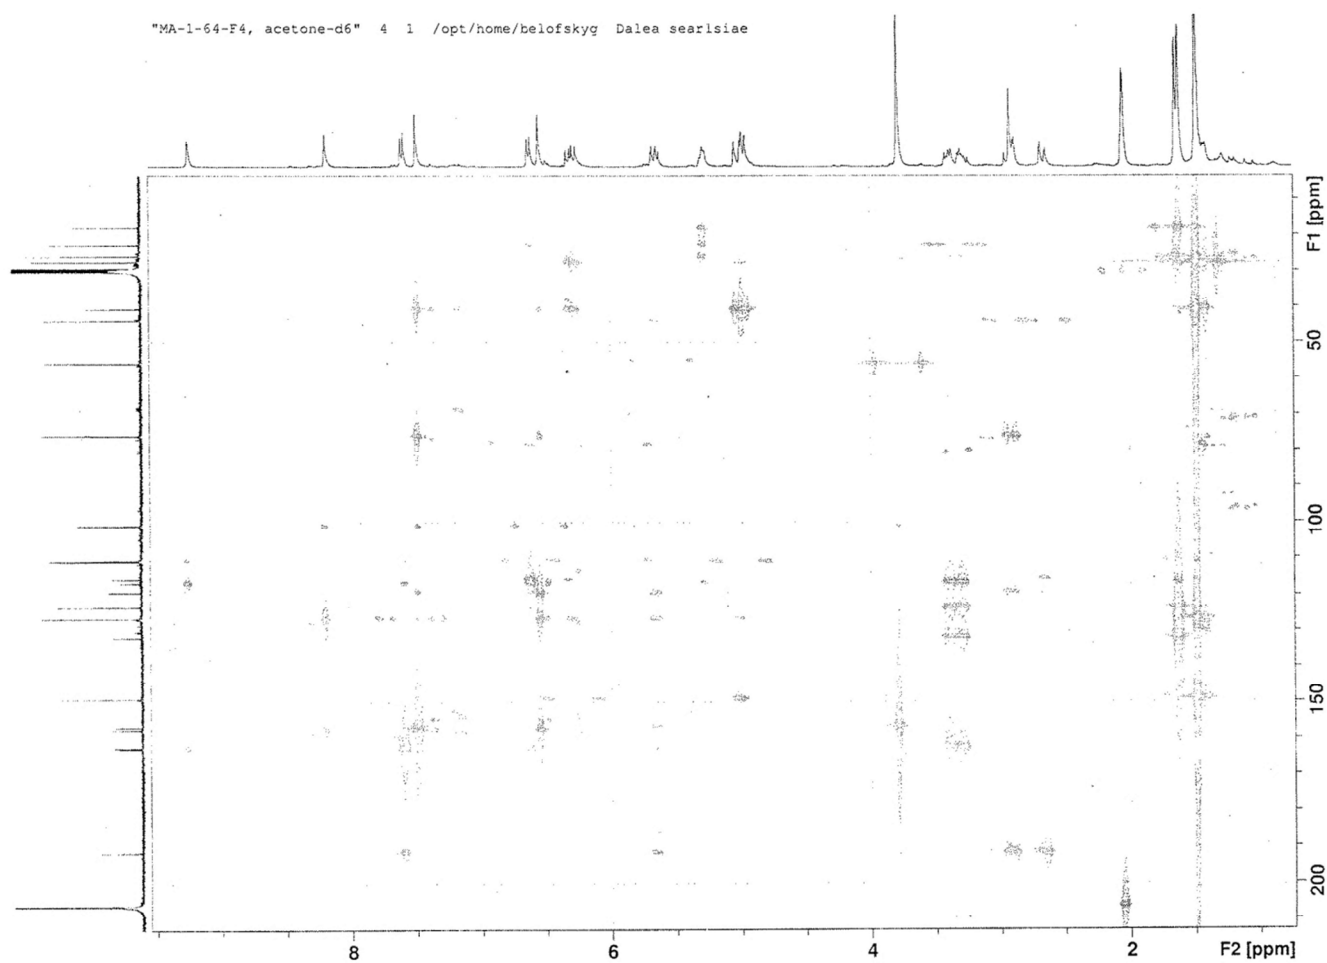

**Figure S19.** HMBC spectrum of malheuran C (**3**) (400 MHz; acetone- $d_6$ ).



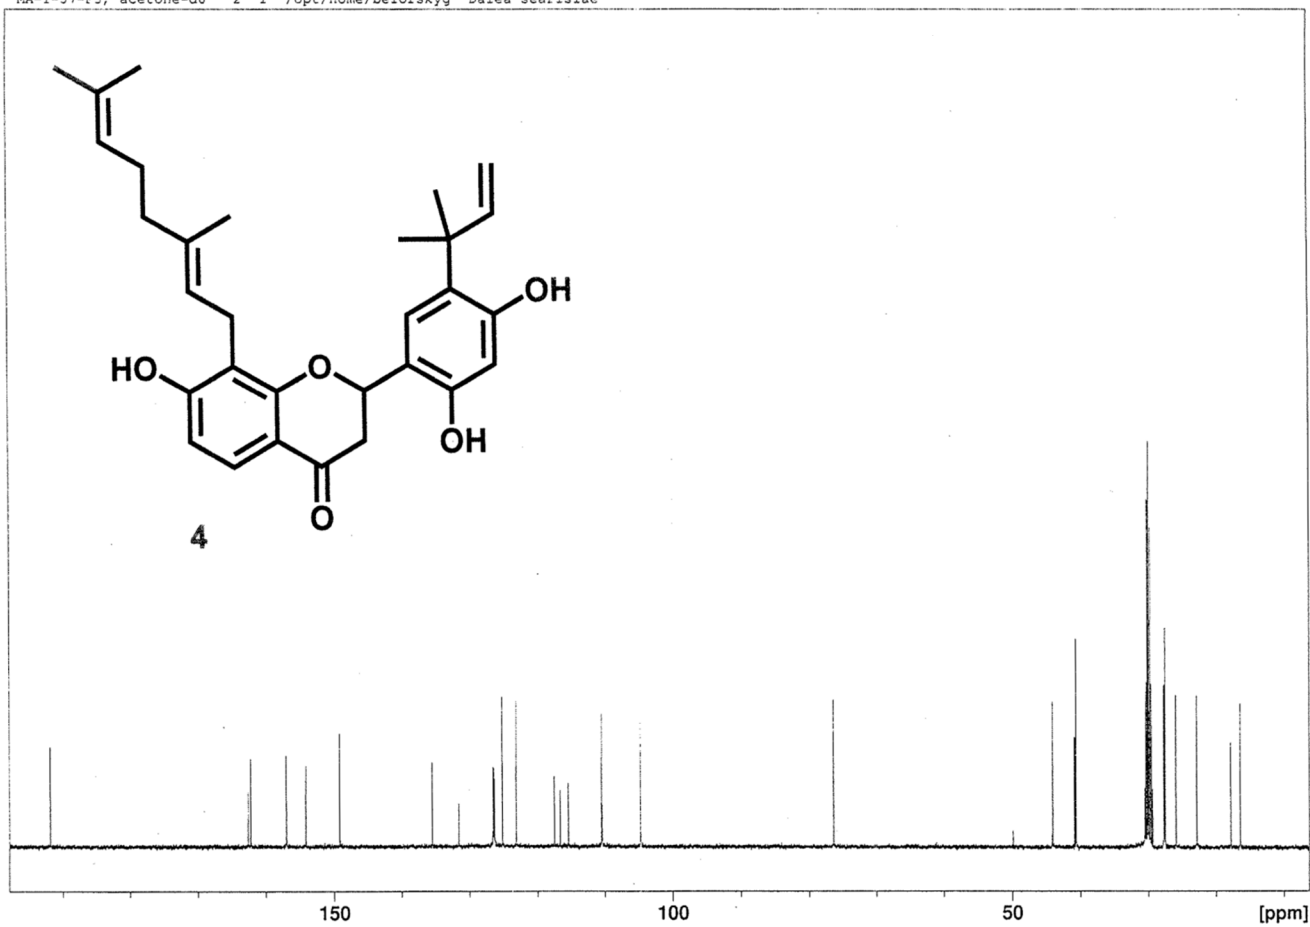

Figure S21. <sup>13</sup>C NMR spectrum of malheuran D (4) (100 MHz; acetone-*d*<sub>6</sub>).

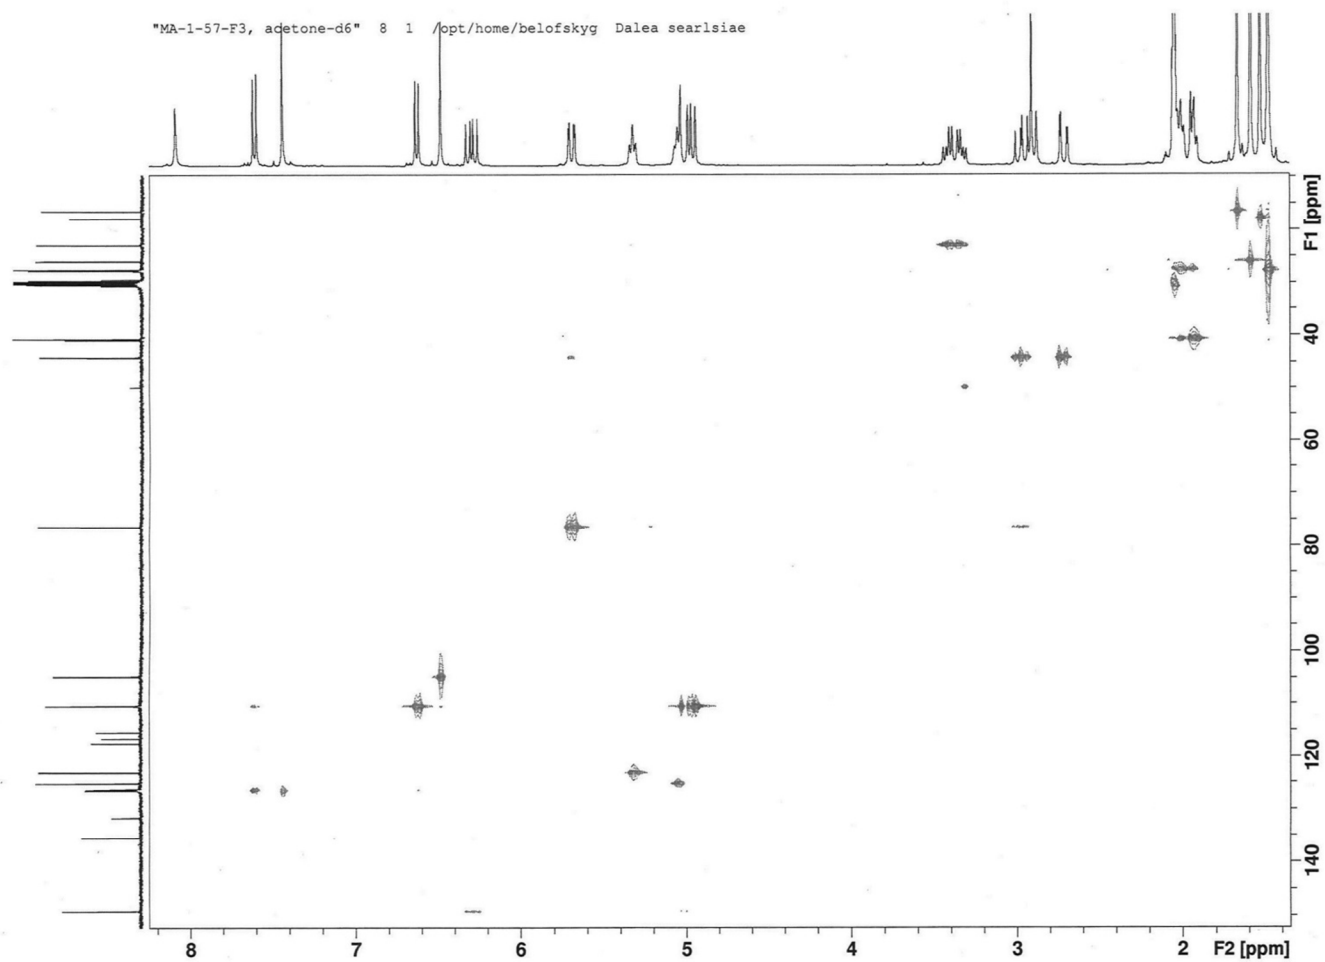

**Figure S22.** HSQC spectrum of malheuran D (**4**) (400 MHz; acetone- $d_6$ ).

"MA-1-57-F3, acetone-d6" 9 1 /opt/home/belofskyg Dalea searlsiae

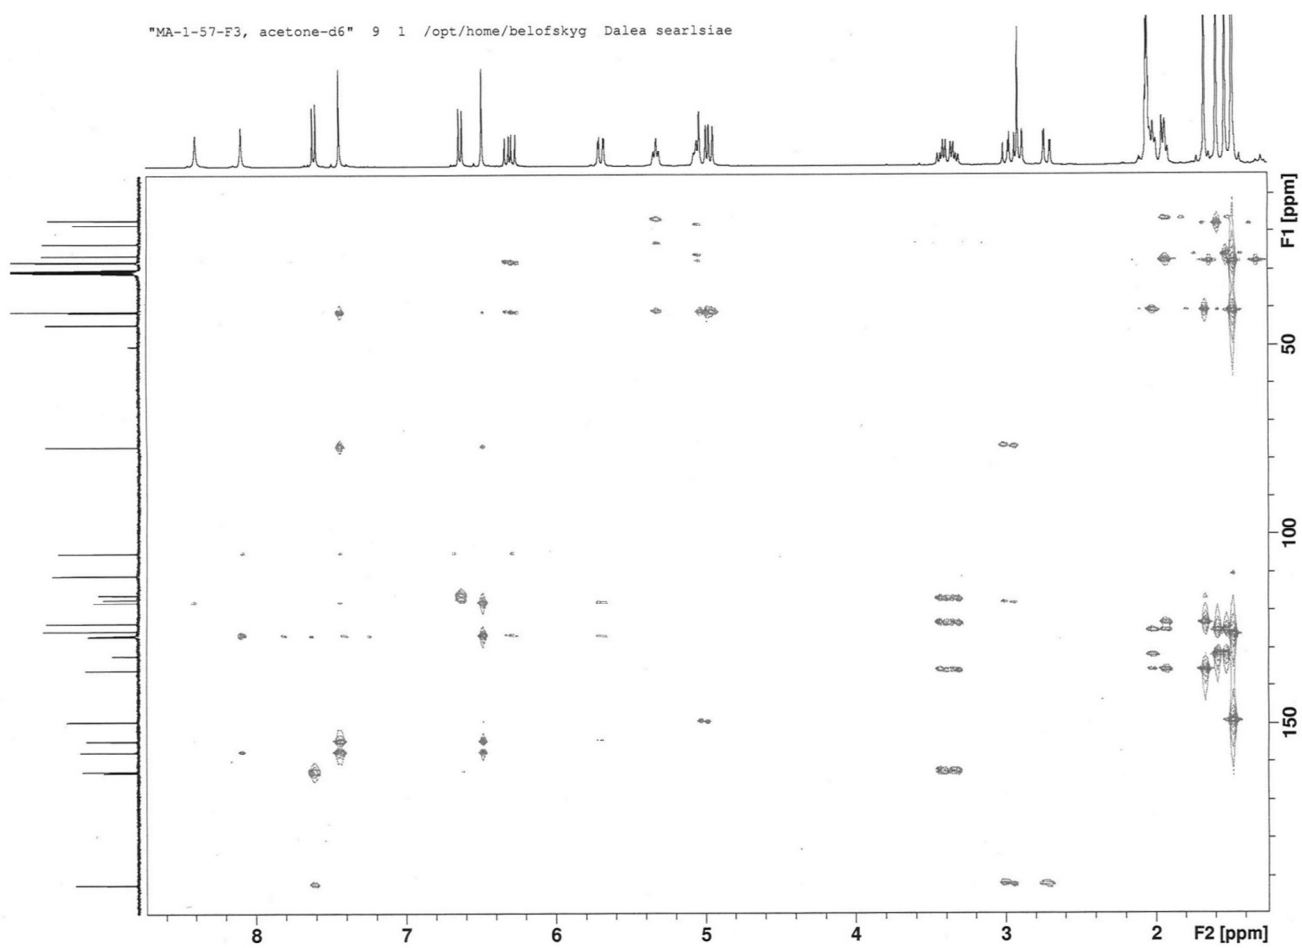

**Figure S23.** HMBC spectrum of malheuran D (4) (400 MHz; acetone- $d_6$ ).

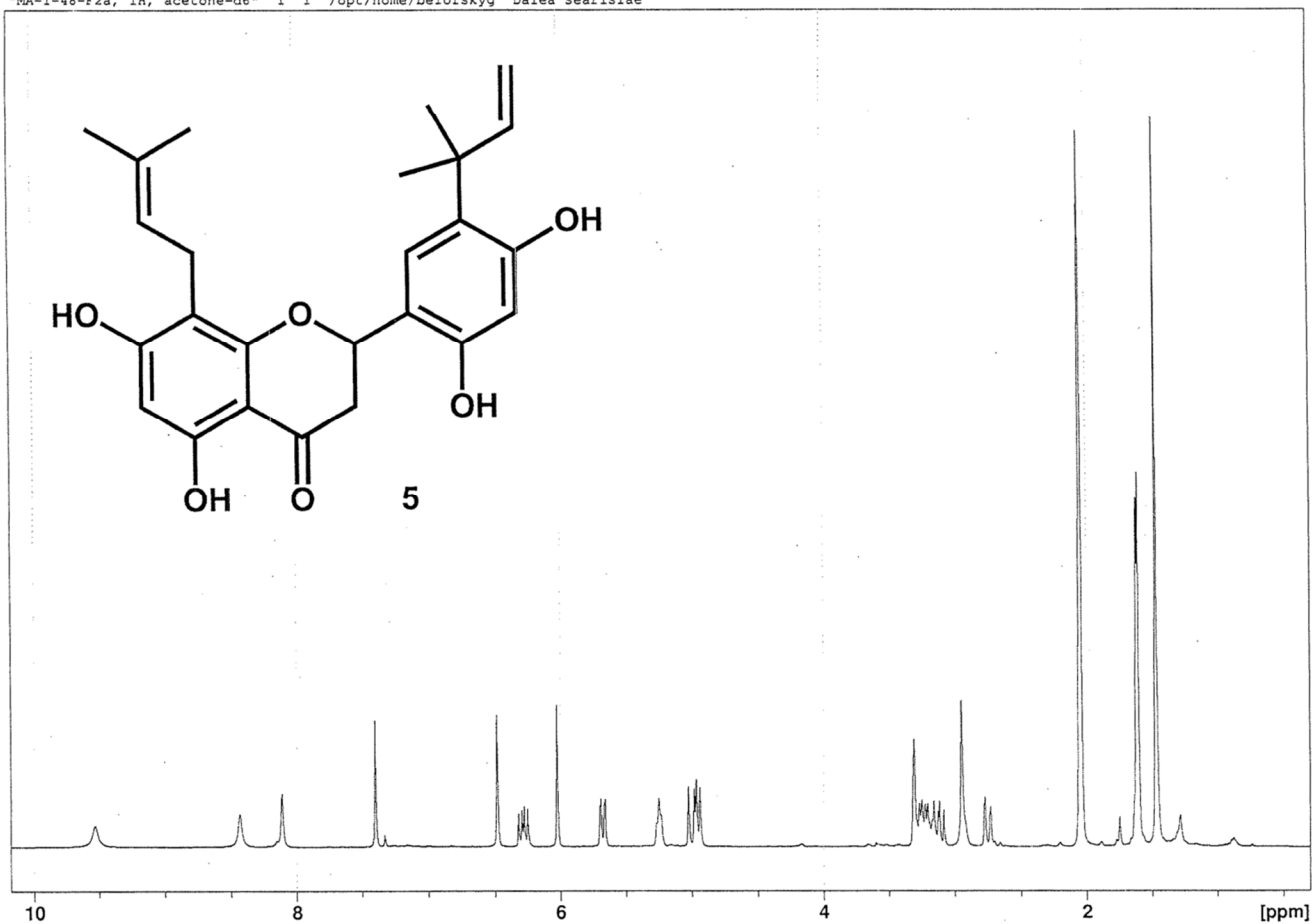

**Figure S24.** <sup>1</sup>H NMR spectrum of (2*S*)-5'-(2-methylbut-3-en-2-yl)-8-(3-methylbut-2-en-1-yl)-5,7,2',4'-tetrahydroxyflavanone (**5**) (400 MHz; acetone-*d*<sub>6</sub>).



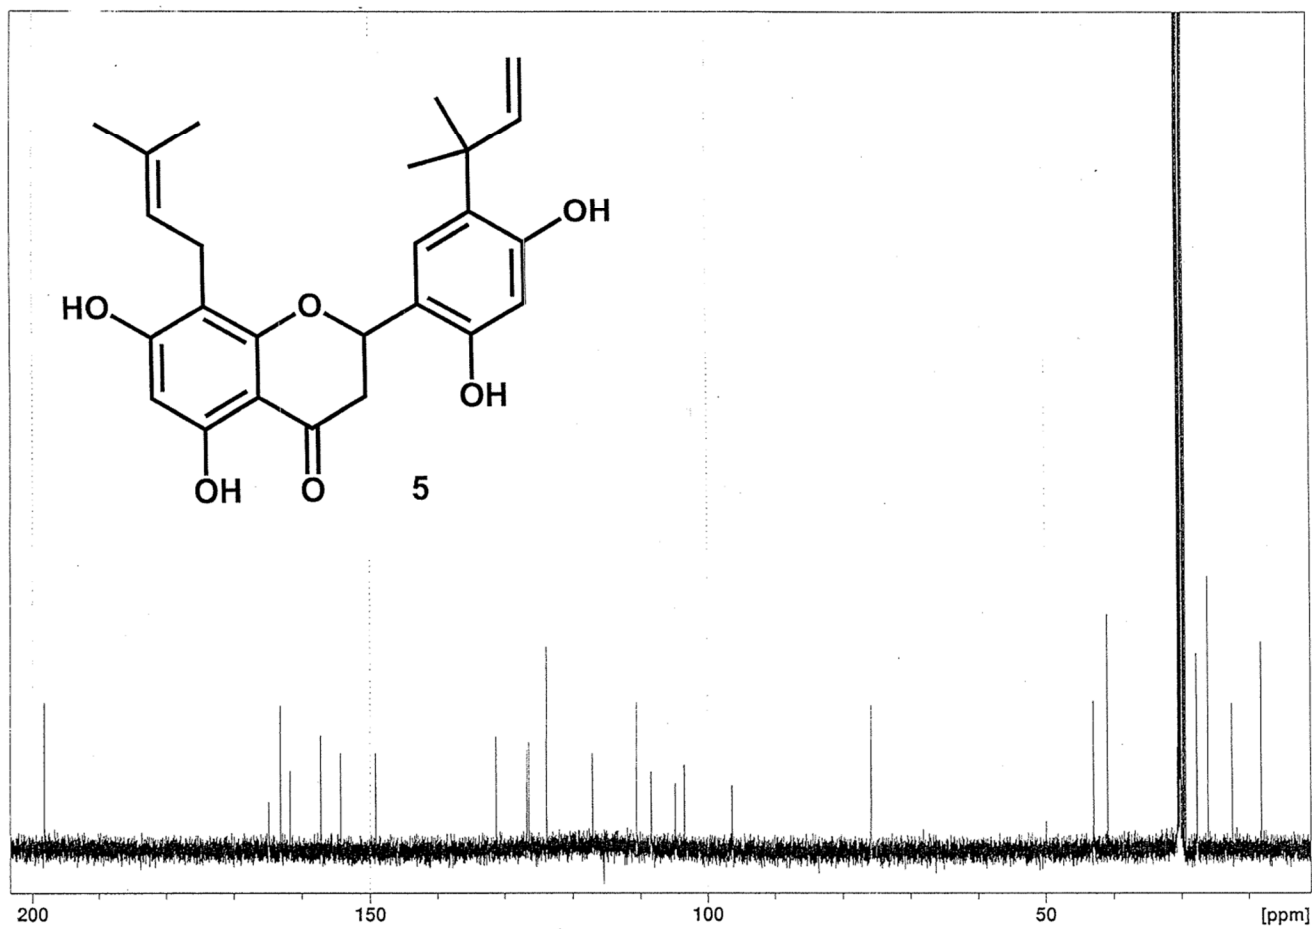

**Figure S25.**  $^{13}\text{C}$  NMR spectrum of (2S)-5'-(2-methylbut-3-en-2-yl)-8-(3-methylbut-2-en-1-yl)-5,7,2',4'-tetrahydroxyflavanone (**5**) (100 MHz; acetone- $d_6$ ).

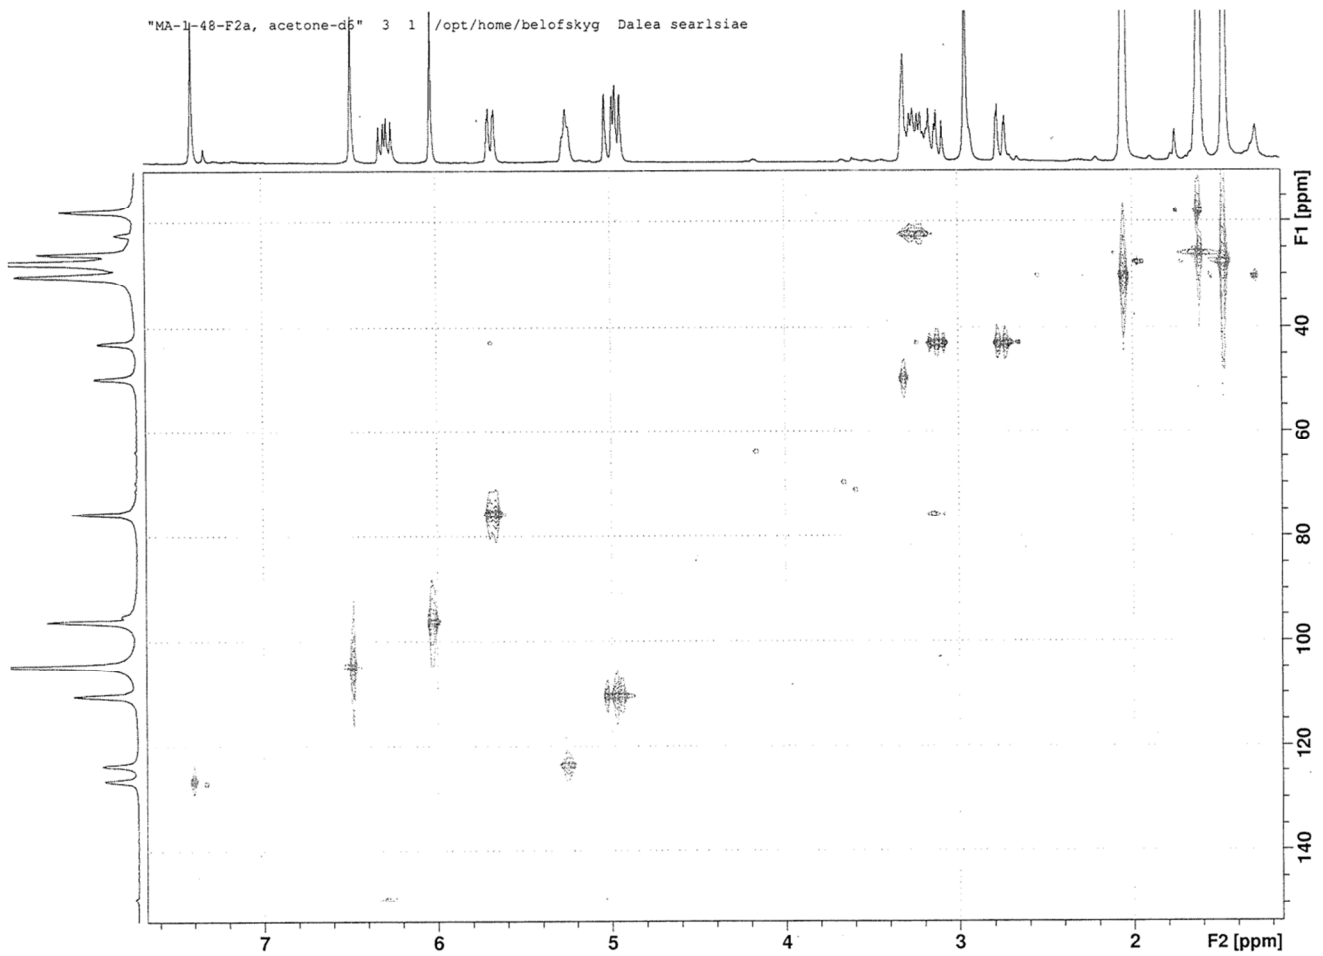

**Figure S26.** HSQC spectrum of (2*S*)-5'-(2-methylbut-3-en-2-yl)-8-(3-methylbut-2-en-1-yl)-5,7,2',4'-tetrahydroxyflavanone (**5**) (400 MHz; acetone-*d*<sub>6</sub>).

"MA-1-48-F2a, acetone-d6" 4 1 /opt/home/belofskyg Dalea searlsiae

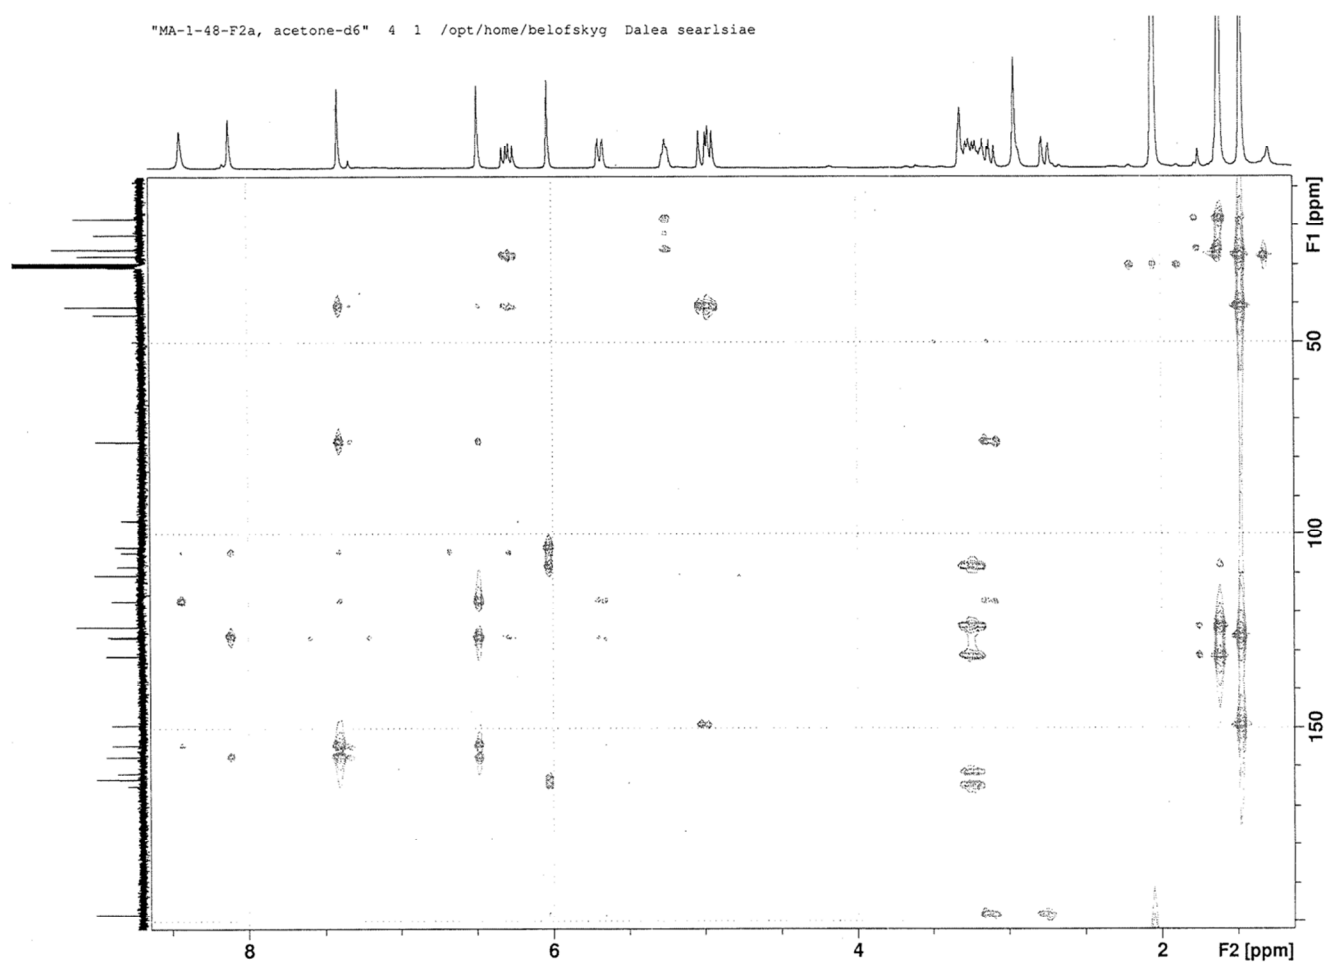

**Figure S27.** HMBC spectrum of (2*S*)-5'-(2-methylbut-3-en-2-yl)-8-(3-methylbut-2-en-1-yl)-5,7,2',4'-tetrahydroxyflavanone (**5**) (400 MHz; acetone-*d*<sub>6</sub>).

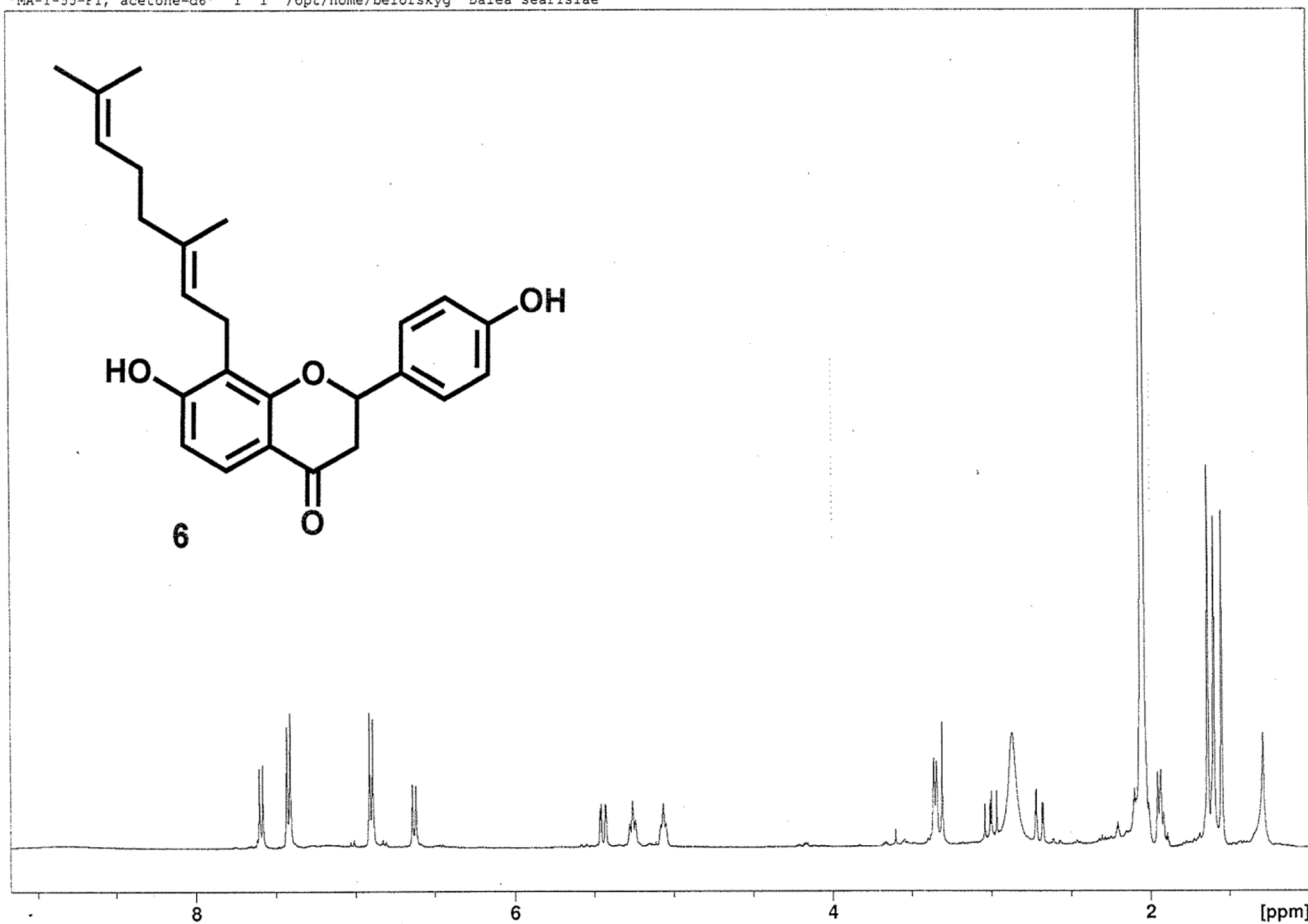

Figure S28. <sup>1</sup>H NMR spectrum of prostratol F (6) (400 MHz; acetone-*d*<sub>6</sub>).

"MA-1-55-F1, 13C, acetone-d6" 1 1 /opt/home/belofskyg Dalea searlsiae

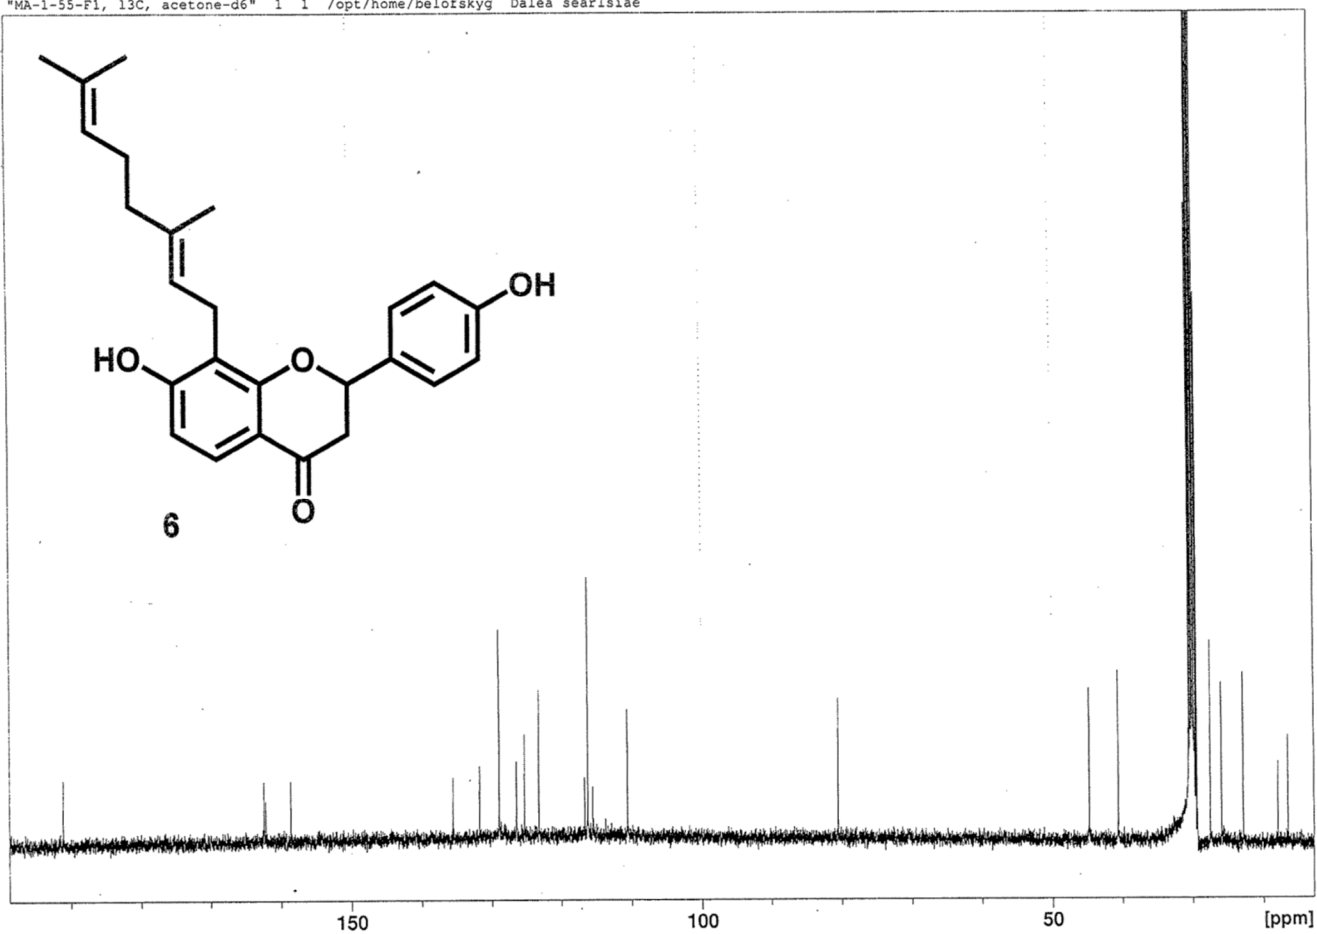

**Figure S29.**  $^{13}\text{C}$  NMR spectrum of prostratol F (**6**) (100 MHz; acetone- $d_6$ ).

"MA-1-55-F1, DEPT, acetone-d6" 1 1 /opt/home/belofskyg Dalea searlsiae

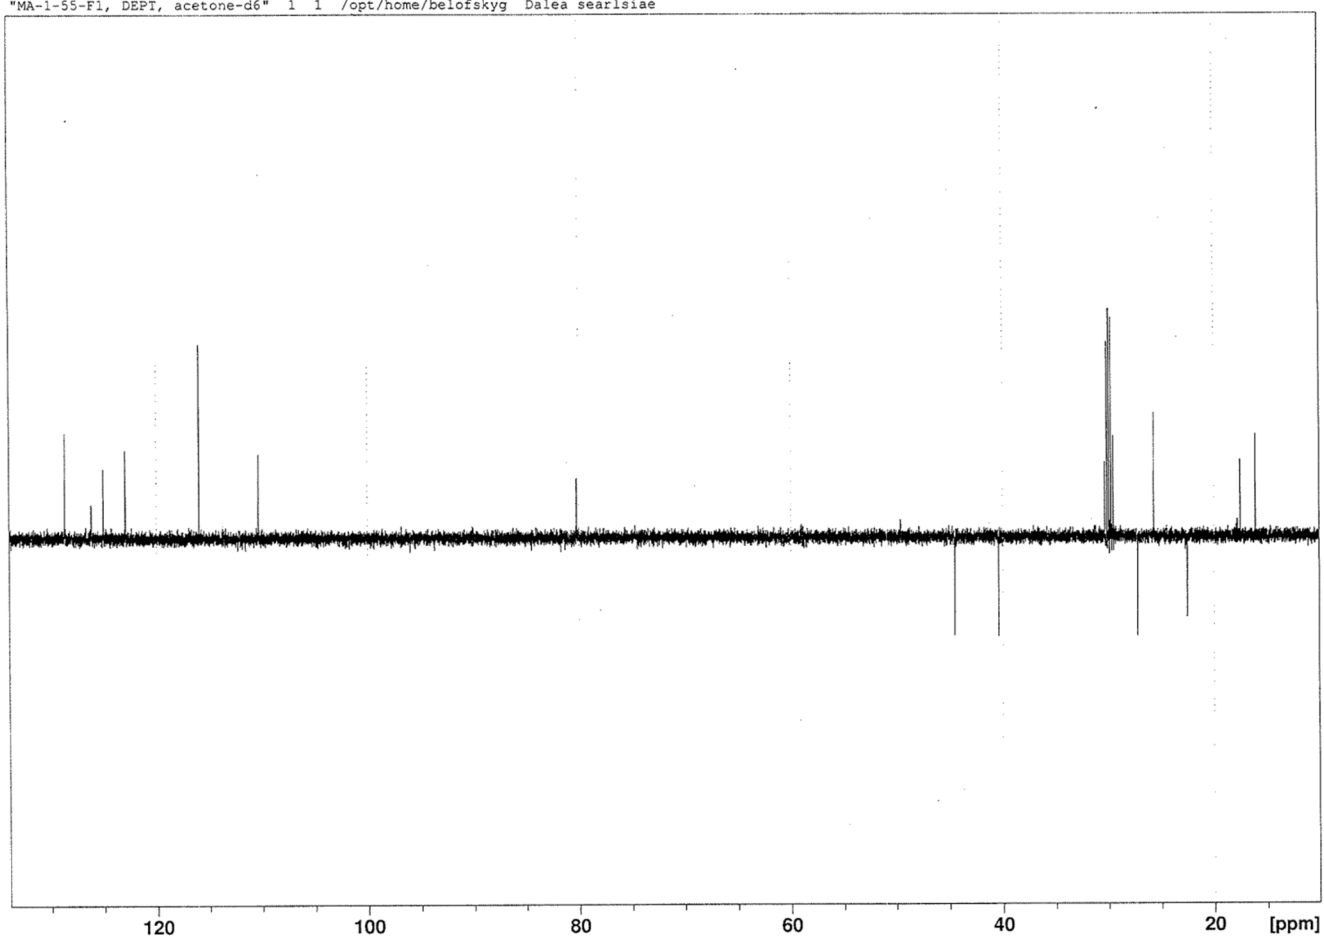

**Figure S30.** DEPT135 spectrum of prostratol F (**6**) (100 MHz; acetone- $d_6$ ).

"MA-1-55-F1, DEPT, acetone-d6" 2 1 /opt/home/belofskyg Dalea searlsiae

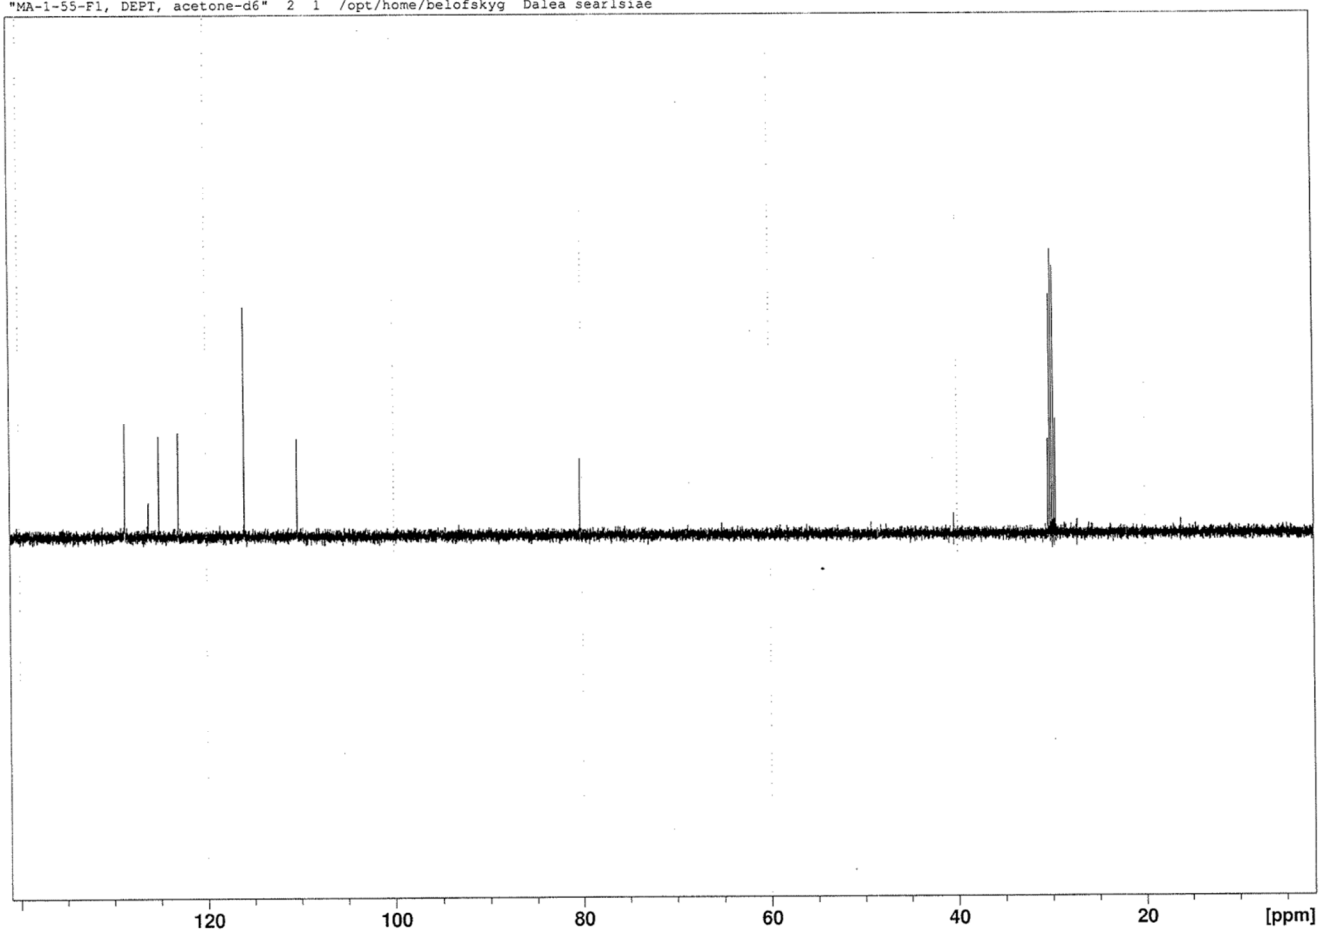

**Figure S31.** DEPT90 spectrum of prostratol F (**6**) (100 MHz; acetone- $d_6$ ).

"MA-1-55-F1, acetone-d6" 2 1 /opt/home/belofskyg Dalea searlsiae

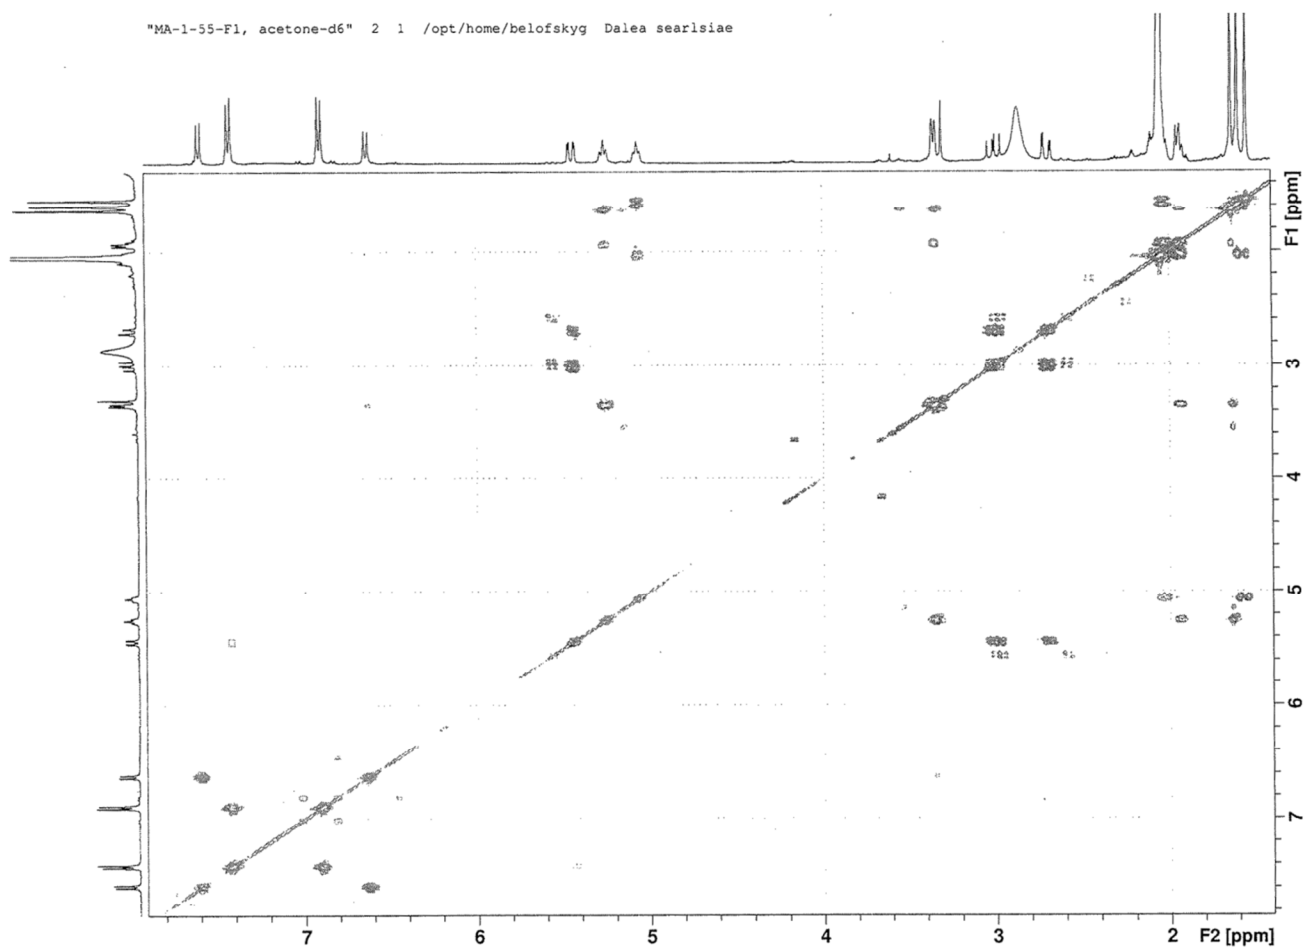

**Figure S32.** COSY spectrum of prostratol F (**6**) (400 MHz; acetone- $d_6$ ).



"MA-1-6-Fl6, 1H, acetone-d6" 1 1 /opt/home/belofskyg Dalea searlsiae

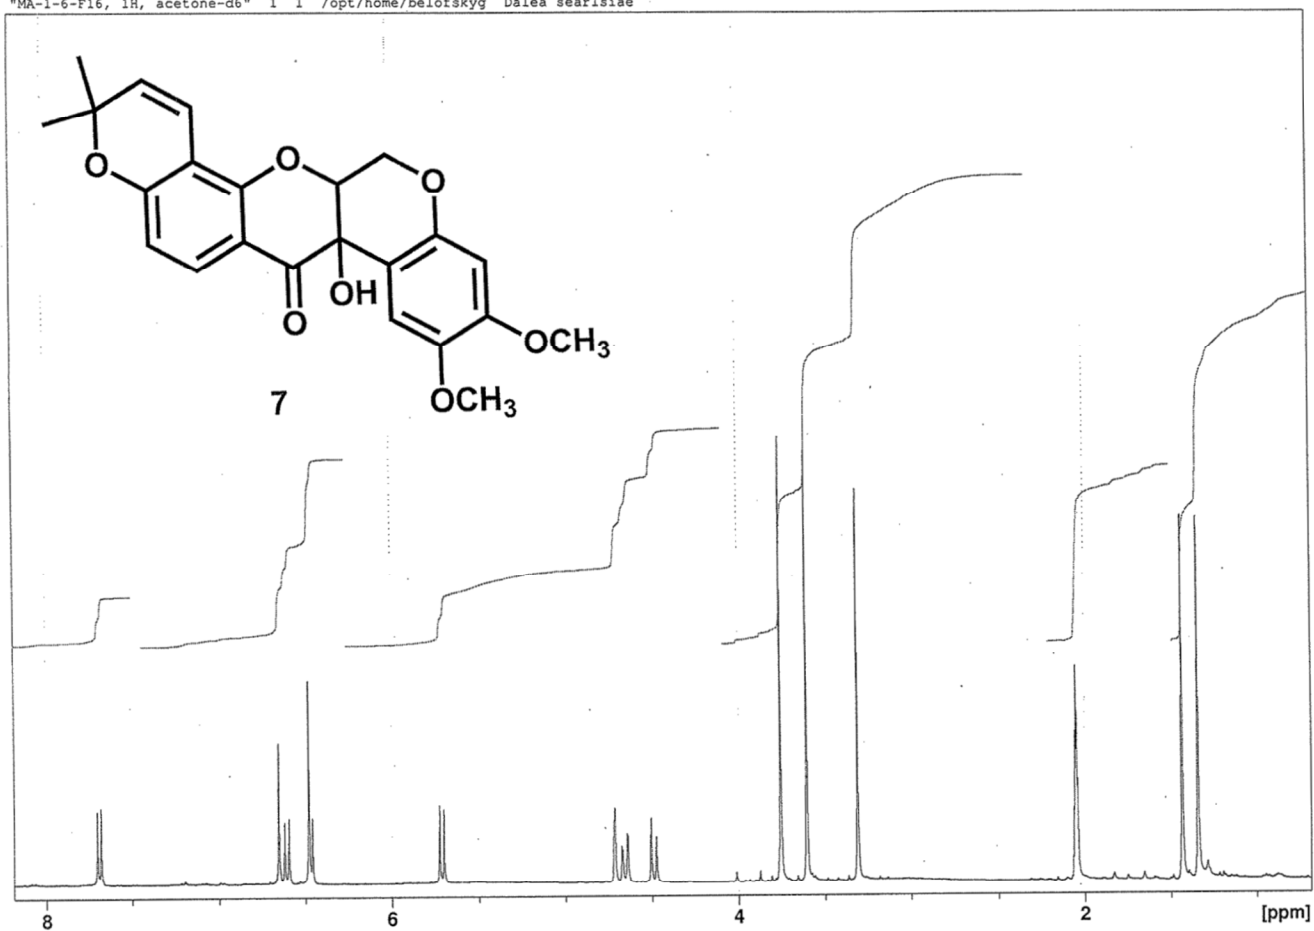

**Figure S33.** <sup>1</sup>H NMR spectrum of (-)-tephrosin (**7**) (400 MHz; acetone-*d*<sub>6</sub>).

"MA-1-6-F16, 13C, acetone-d6" 1 1 /opt/home/belofskyg Dalea searlsiae

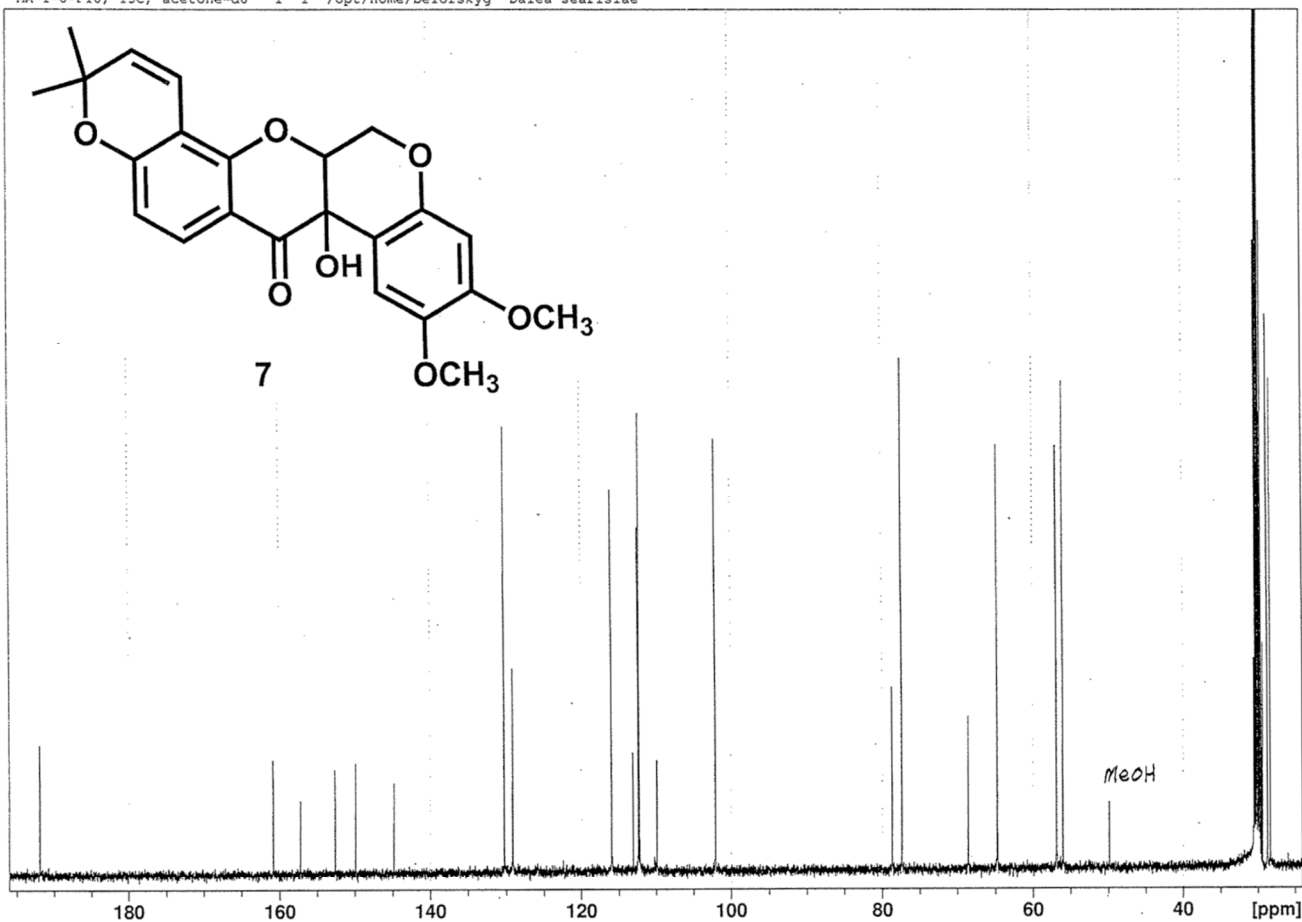

**Figure S34.**  $^{13}\text{C}$  NMR spectrum of (-)-tephrosin (**7**) (100 MHz; acetone- $d_6$ ).

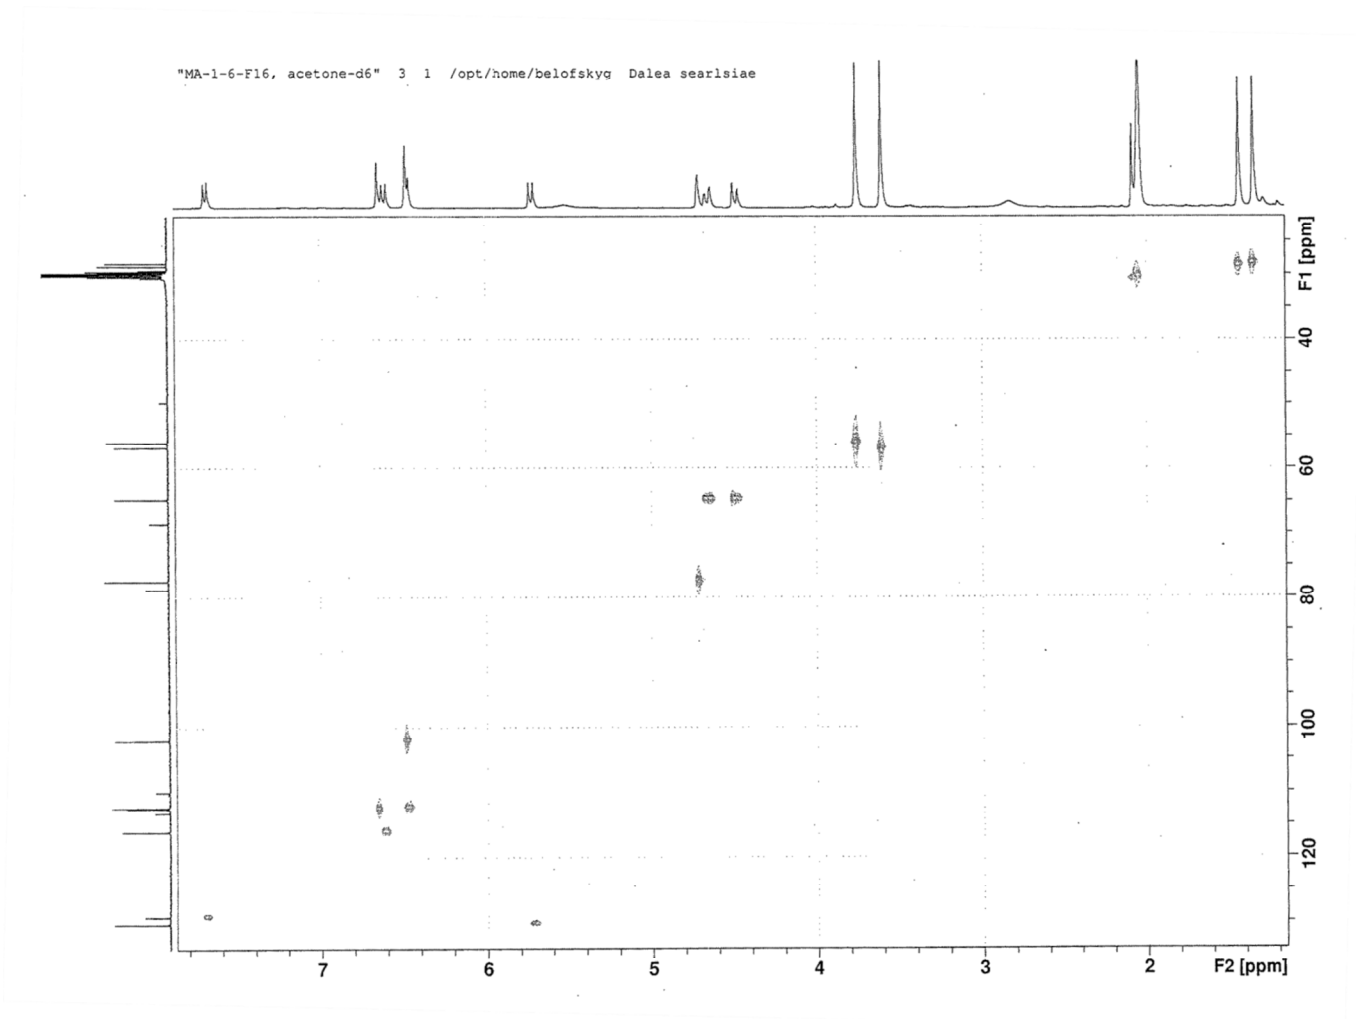

**Figure S35.** HSQC spectrum of (-)-tephrosin (**7**) (400 MHz; acetone- $d_6$ ).

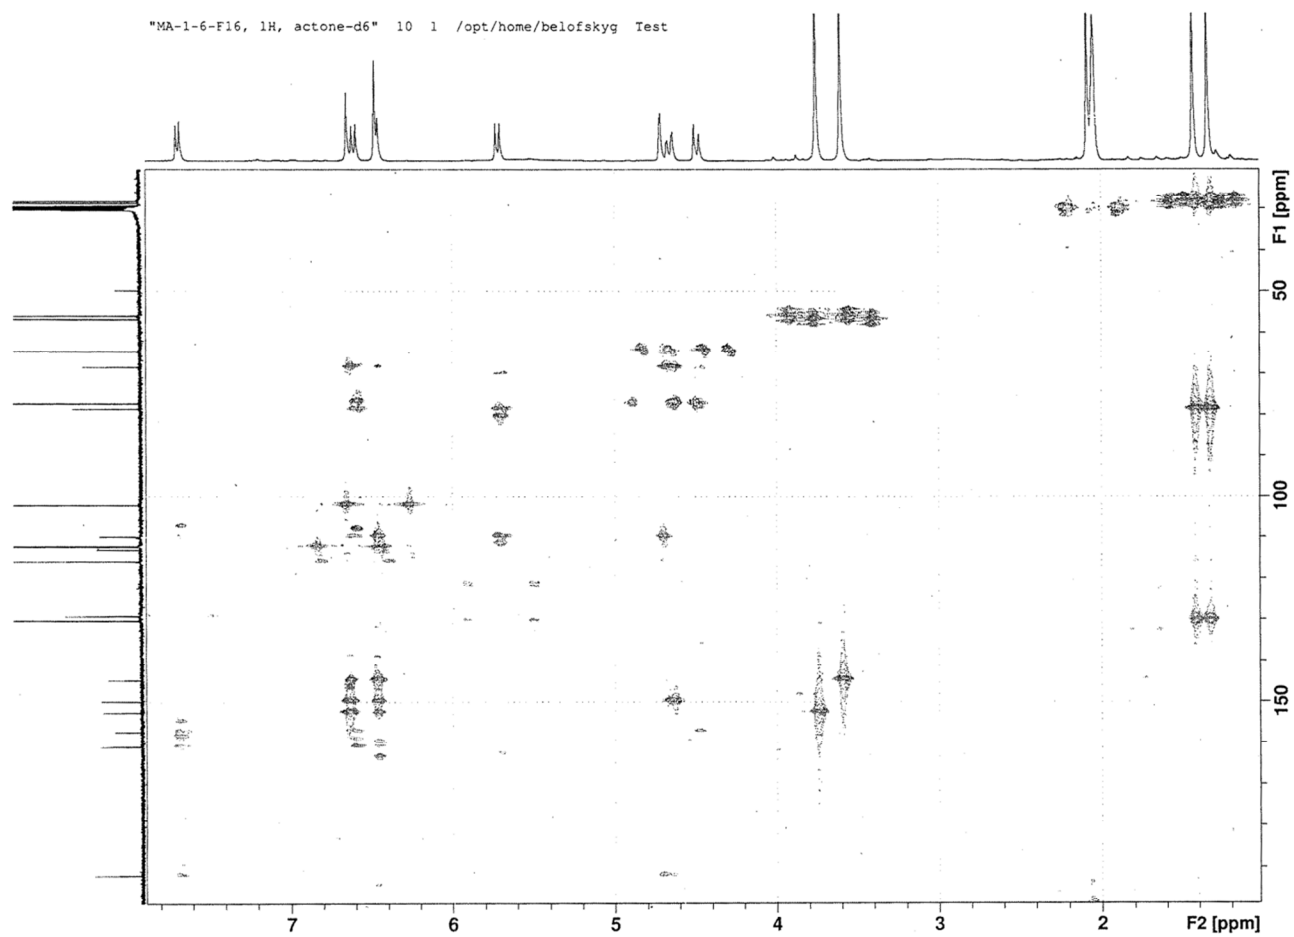

**Figure S36.** HMBC spectrum of (-)-tephrosin (**7**) (400 MHz; acetone- $d_6$ ).

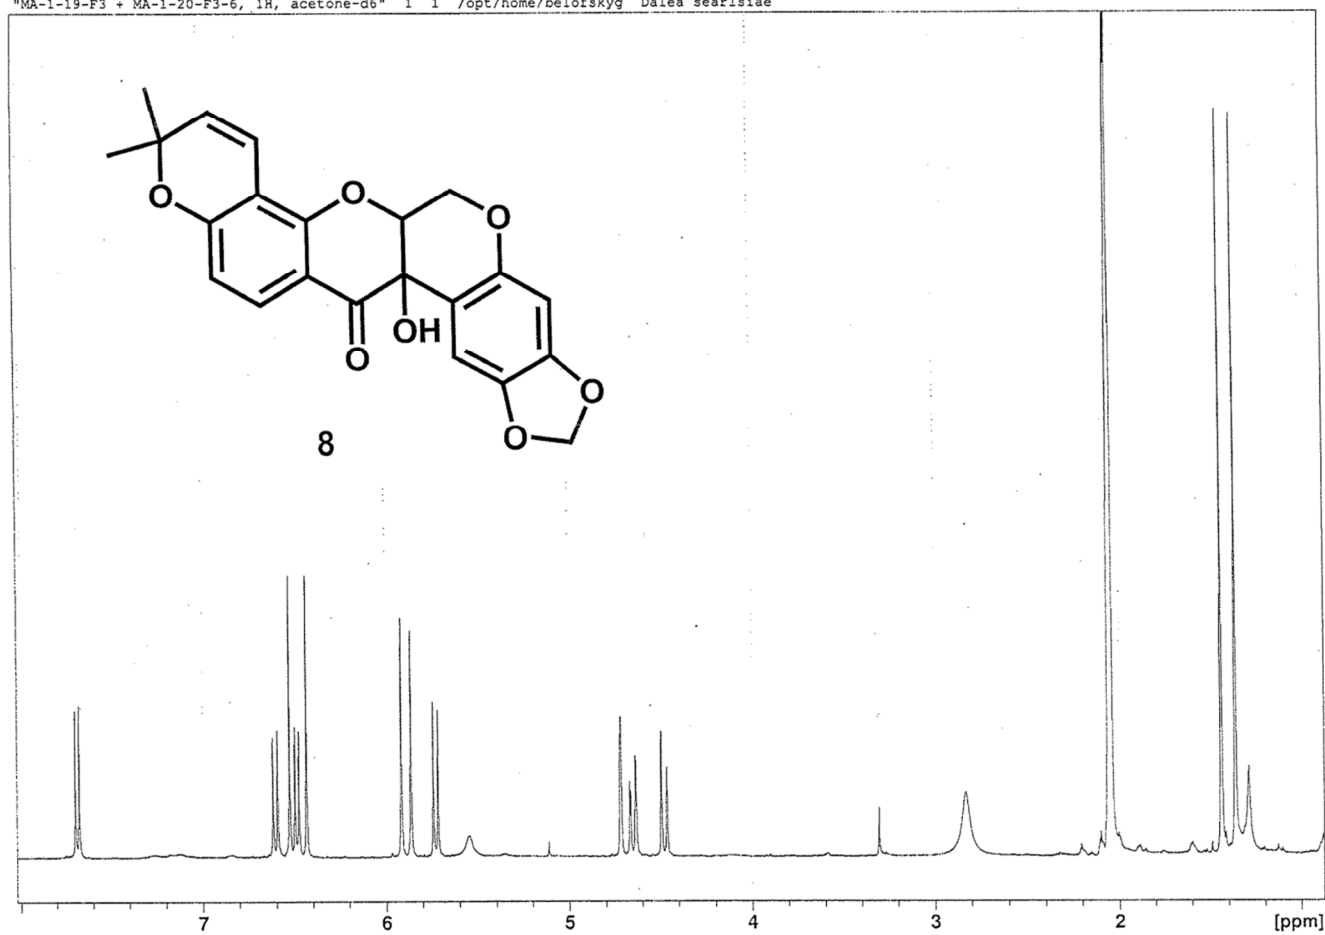

Figure S37.  $^1\text{H}$  NMR spectrum of (-)-millettosin (**8**) (400 MHz; acetone- $d_6$ ).

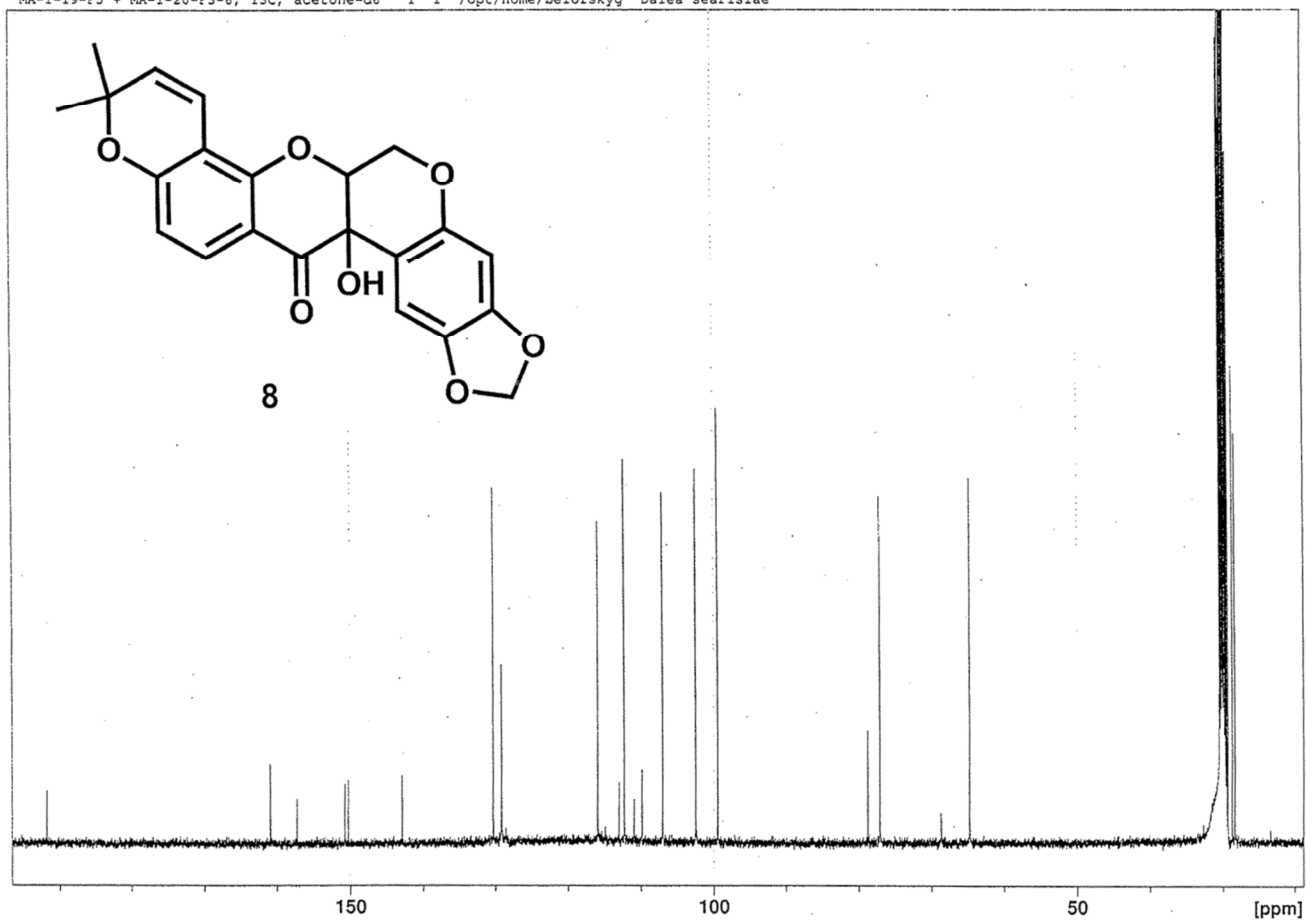

**Figure S38.** <sup>13</sup>C NMR spectrum of (-)-millettosin (**8**) (100 MHz; acetone-*d*<sub>6</sub>).

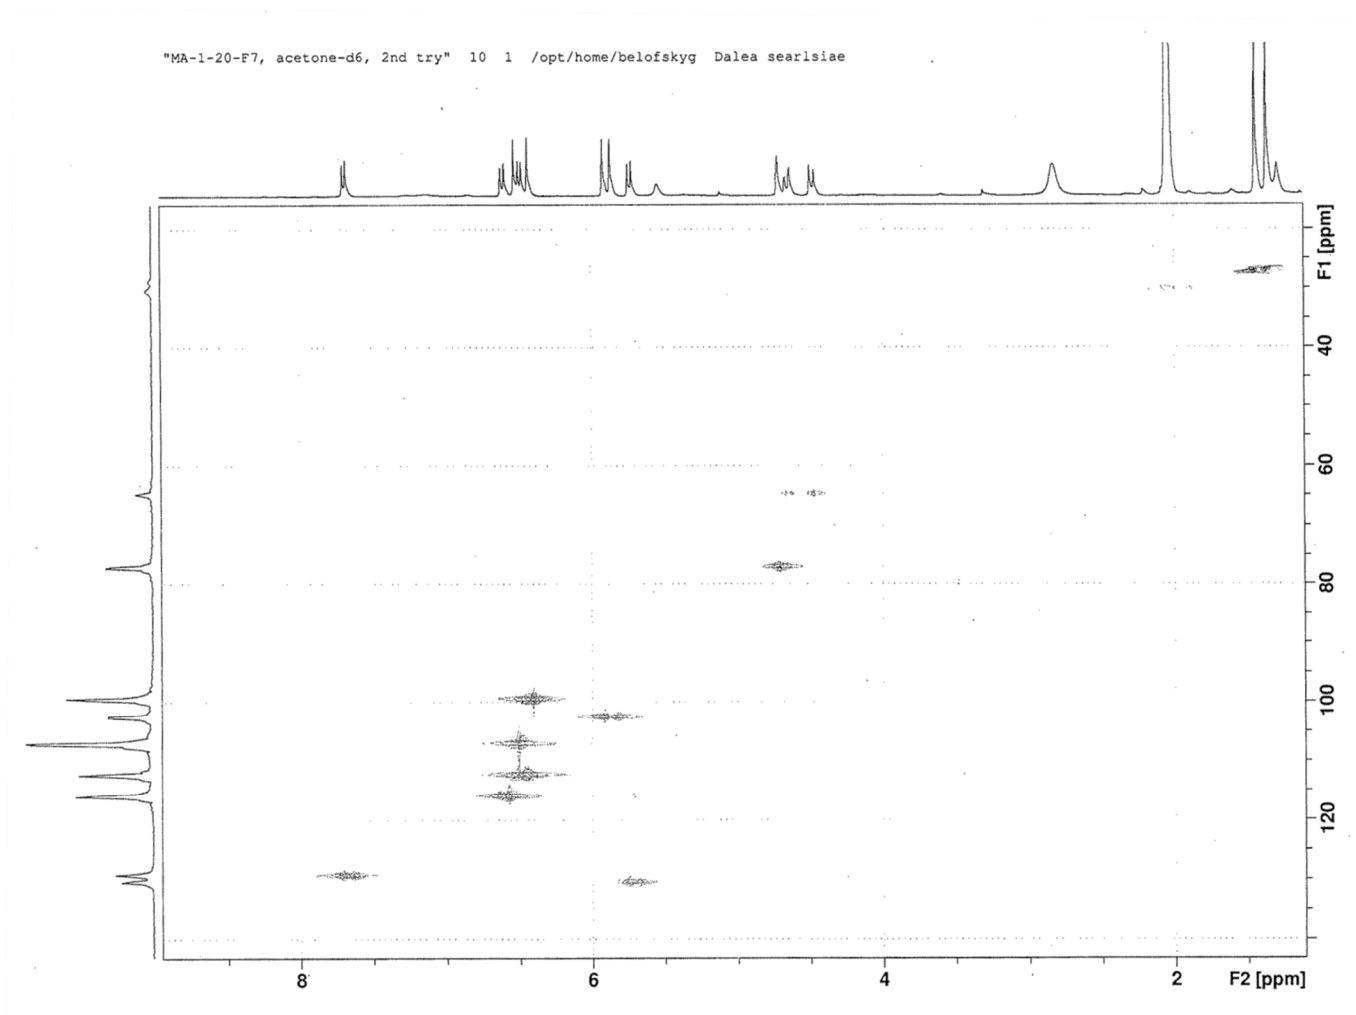

**Figure S39.** HSQC spectrum of (-)-millettosin (**8**) (400 MHz; acetone- $d_6$ ).

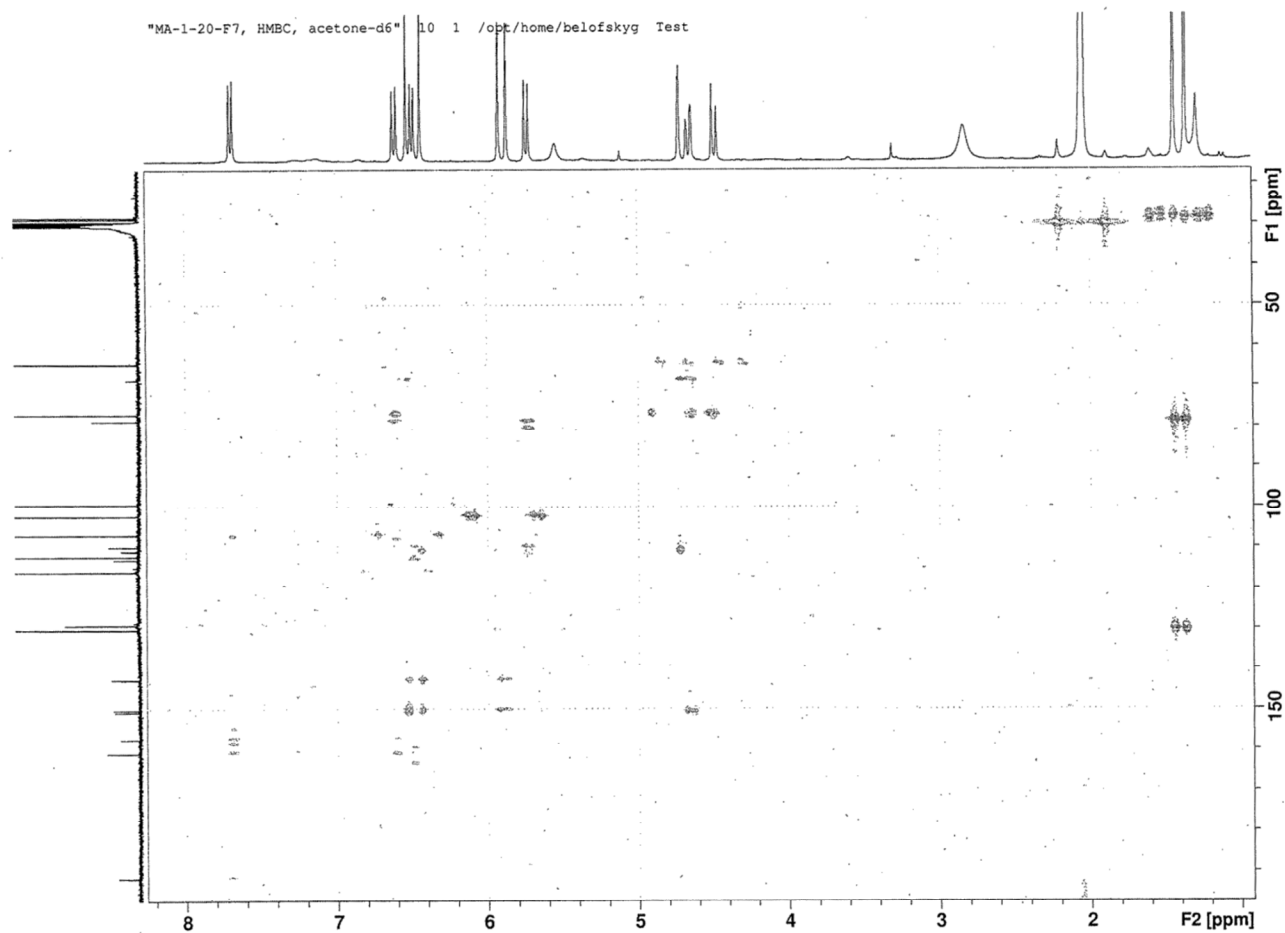

**Figure S40.** HMBC spectrum of (-)-millettosin (**8**) (400 MHz; acetone- $d_6$ ).



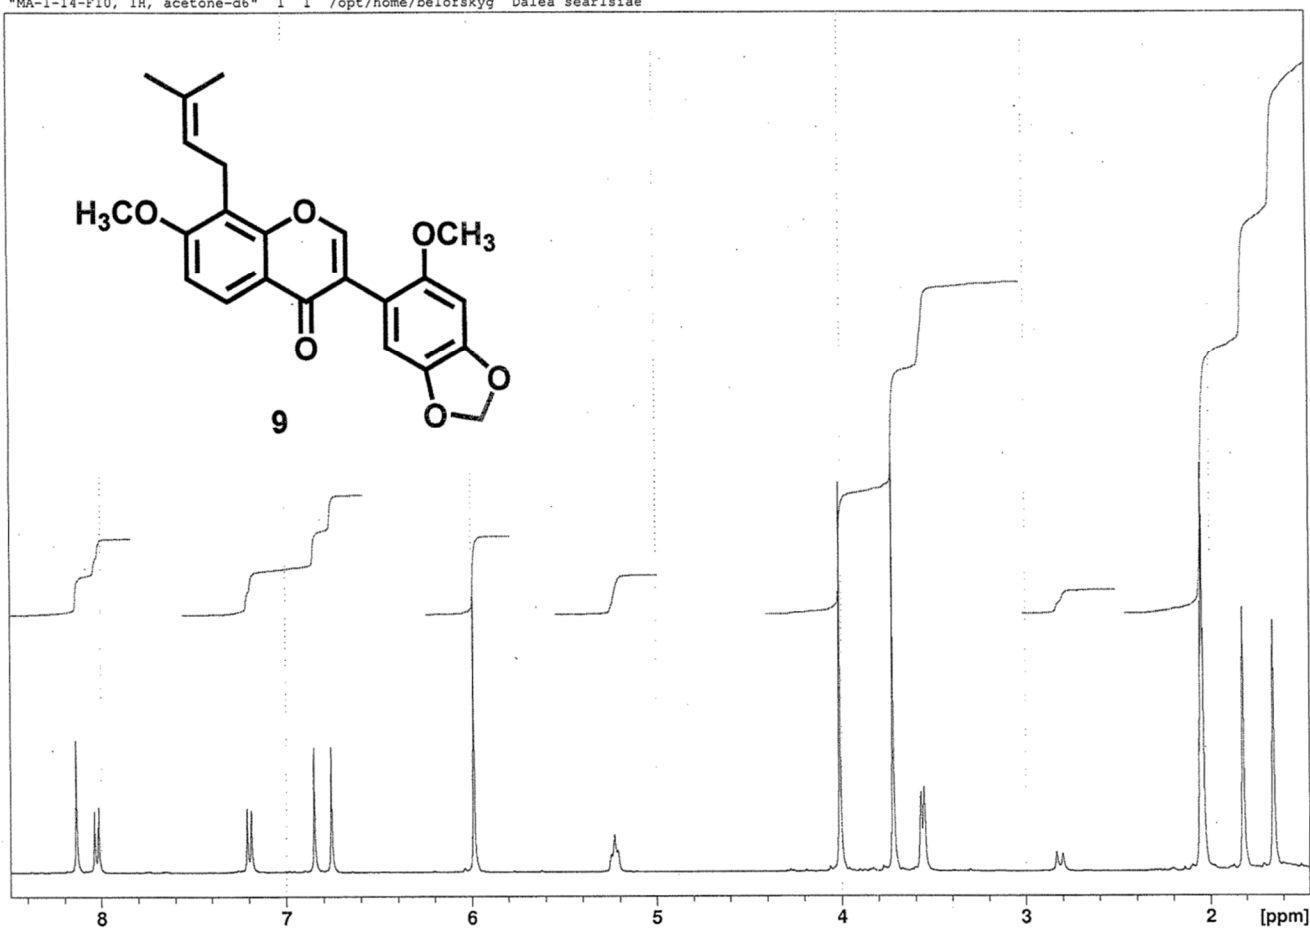

**Figure S41.** <sup>1</sup>H NMR spectrum of griffonianone E (**9**) (400 MHz; acetone-*d*<sub>6</sub>).

"MA-1-14-F10, 13C, acetone-d6" 1 1 /opt/home/belofskyg Dalea searlsiae

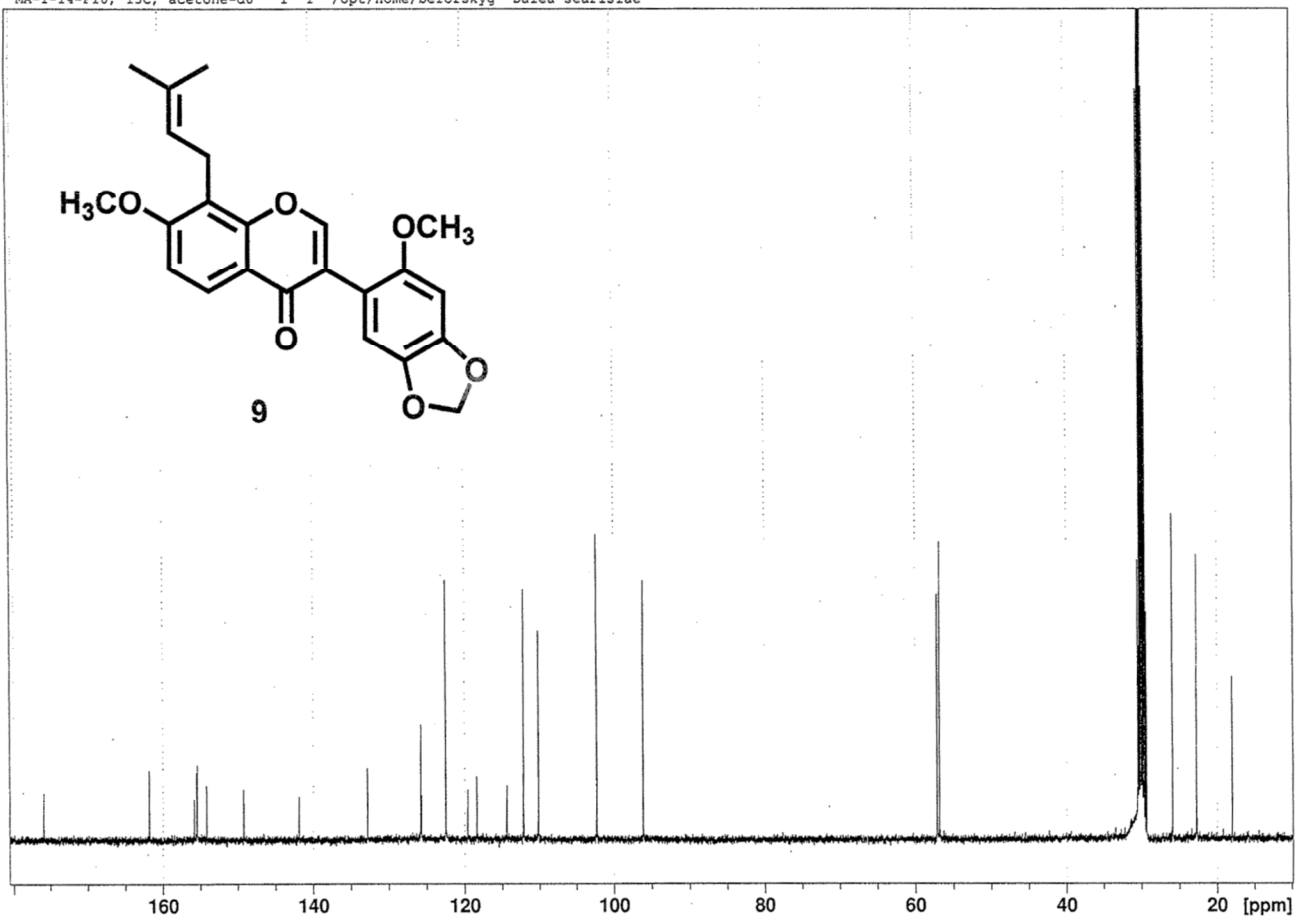

Figure S42. <sup>13</sup>C NMR spectrum of griffonianone E (9) (100 MHz; acetone-*d*<sub>6</sub>).

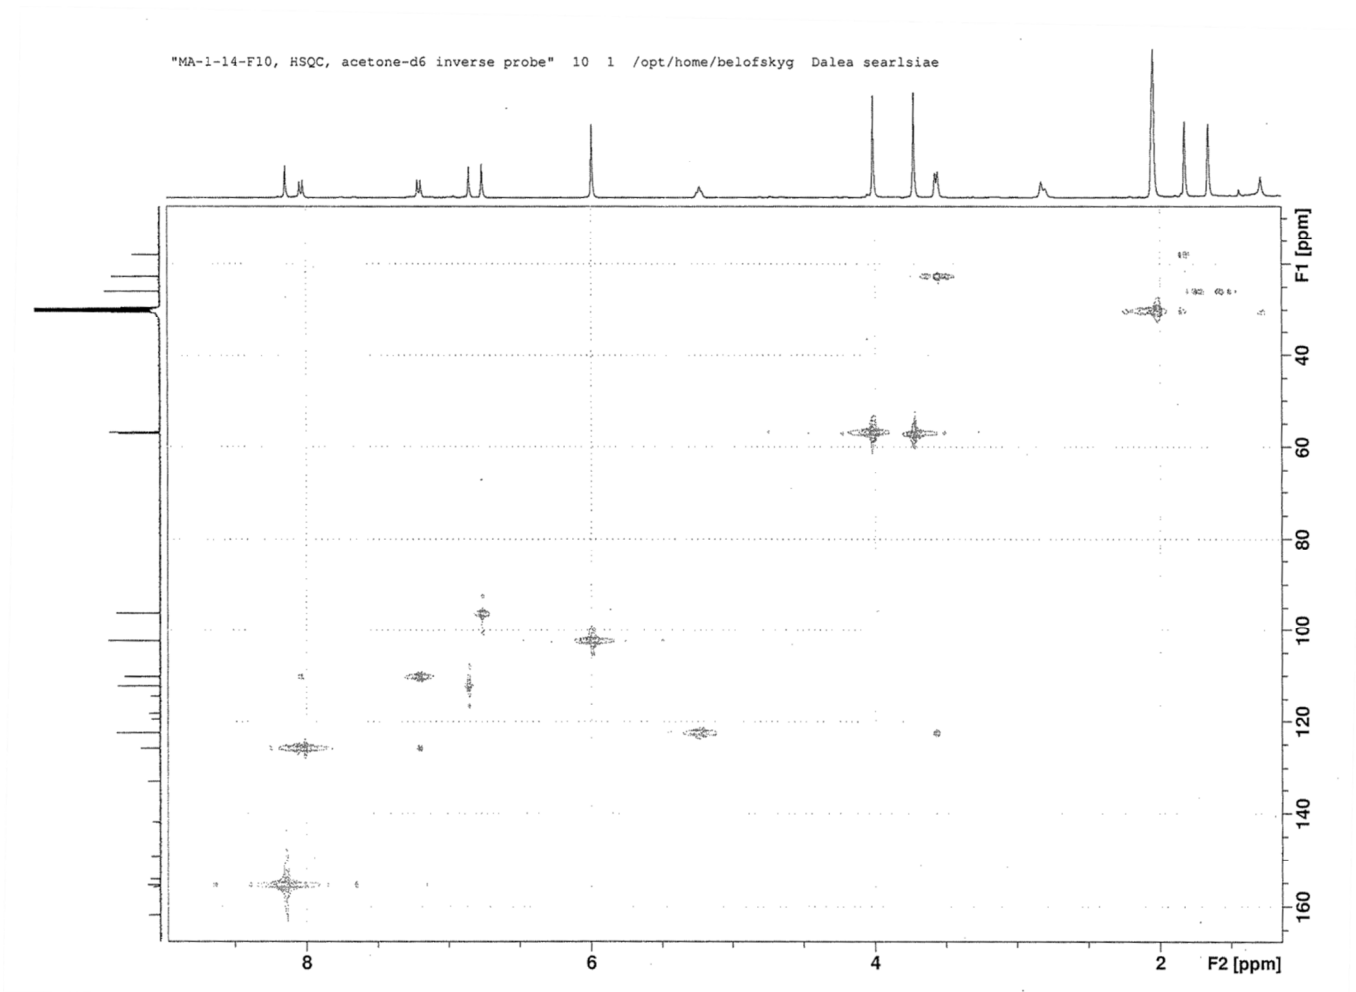

**Figure S43.** HSQC spectrum of griffonianone E (**9**) (400 MHz; acetone- $d_6$ ).

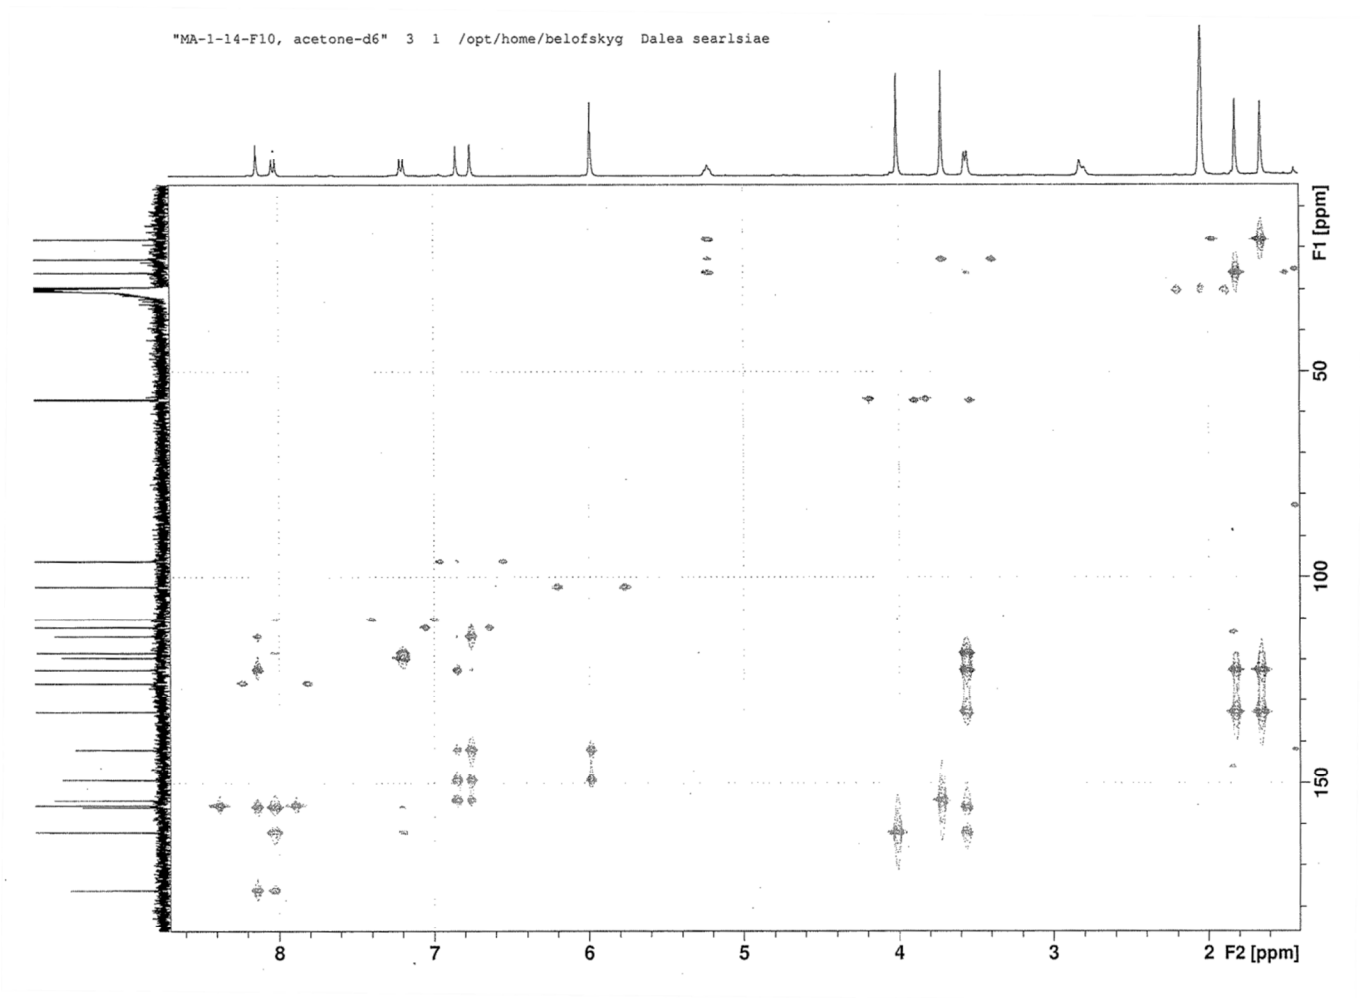

**Figure S44.** HMBC spectrum of griffonianone E (**9**) (400 MHz; acetone- $d_6$ ).

"MA-1-14-F3, 1H, acetone-d6 2" 1 1 /opt/home/belofskyg Dalea searisiae

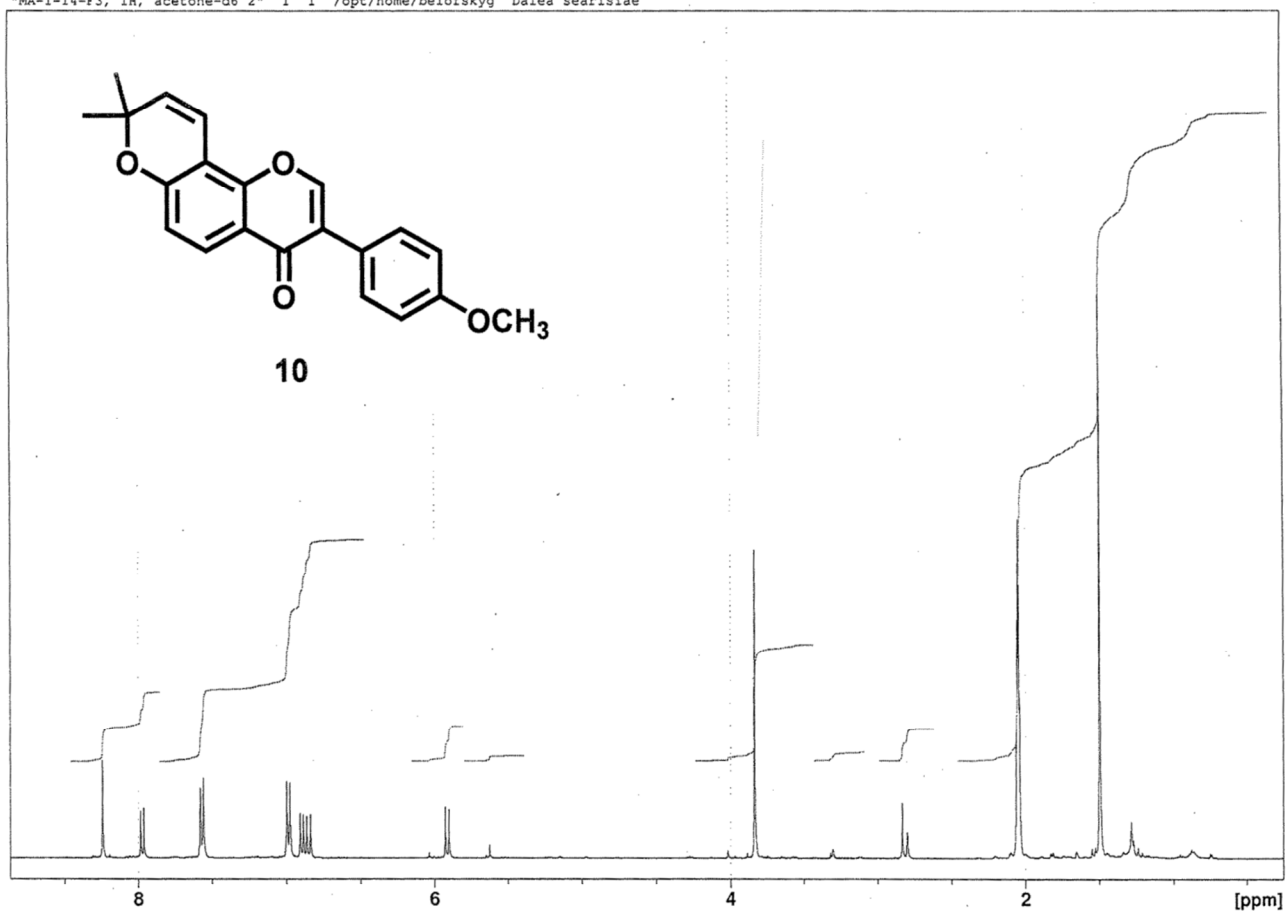

**Figure S45.** <sup>1</sup>H NMR spectrum of calopogonium isoflavone A (**10**) (400 MHz; acetone-*d*<sub>6</sub>).

"MA-1-14-F3, 13C, acetone-d6" 1 1 /opt/home/belofskyg Dalea searlsiae

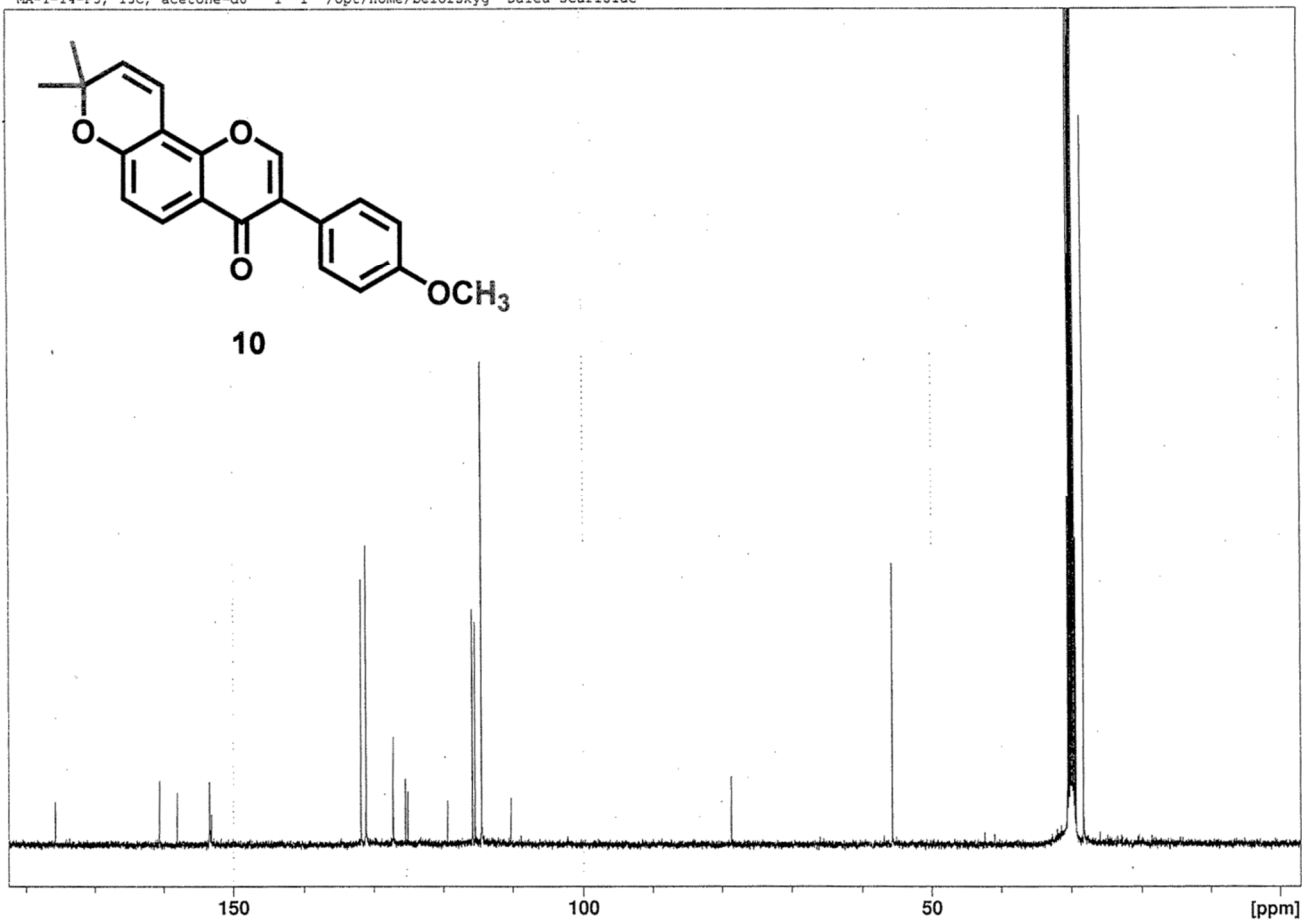

Figure S46. <sup>13</sup>C NMR spectrum of calopogonium isoflavone A (**10**) (100 MHz; acetone-*d*<sub>6</sub>).

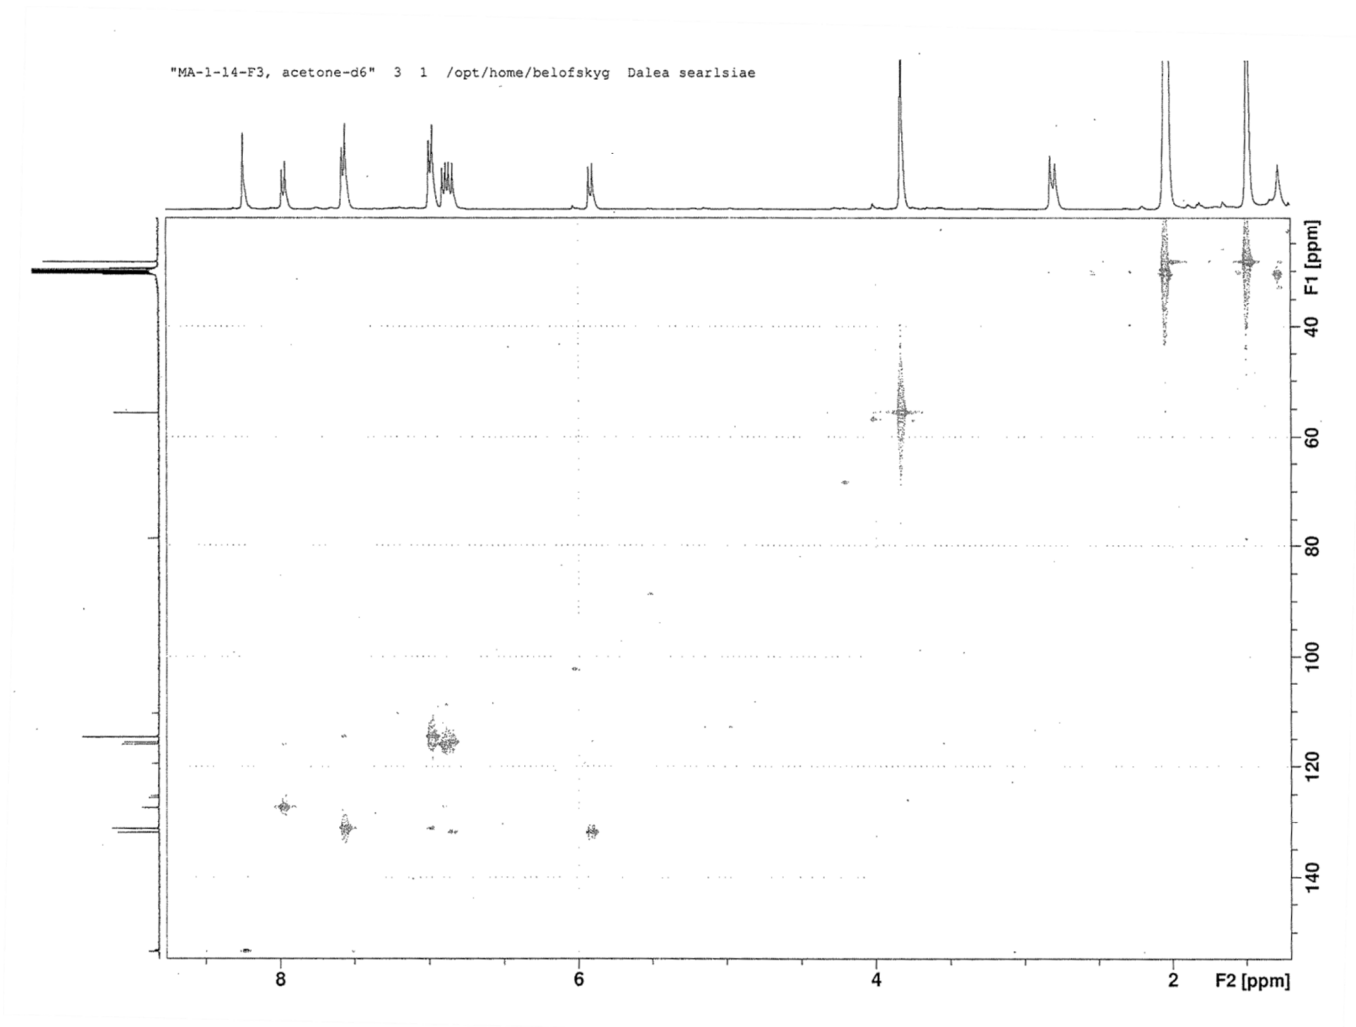

**Figure S47.** HSQC spectrum of calopogonium isoflavone A (**10**) (400 MHz; acetone- $d_6$ ).

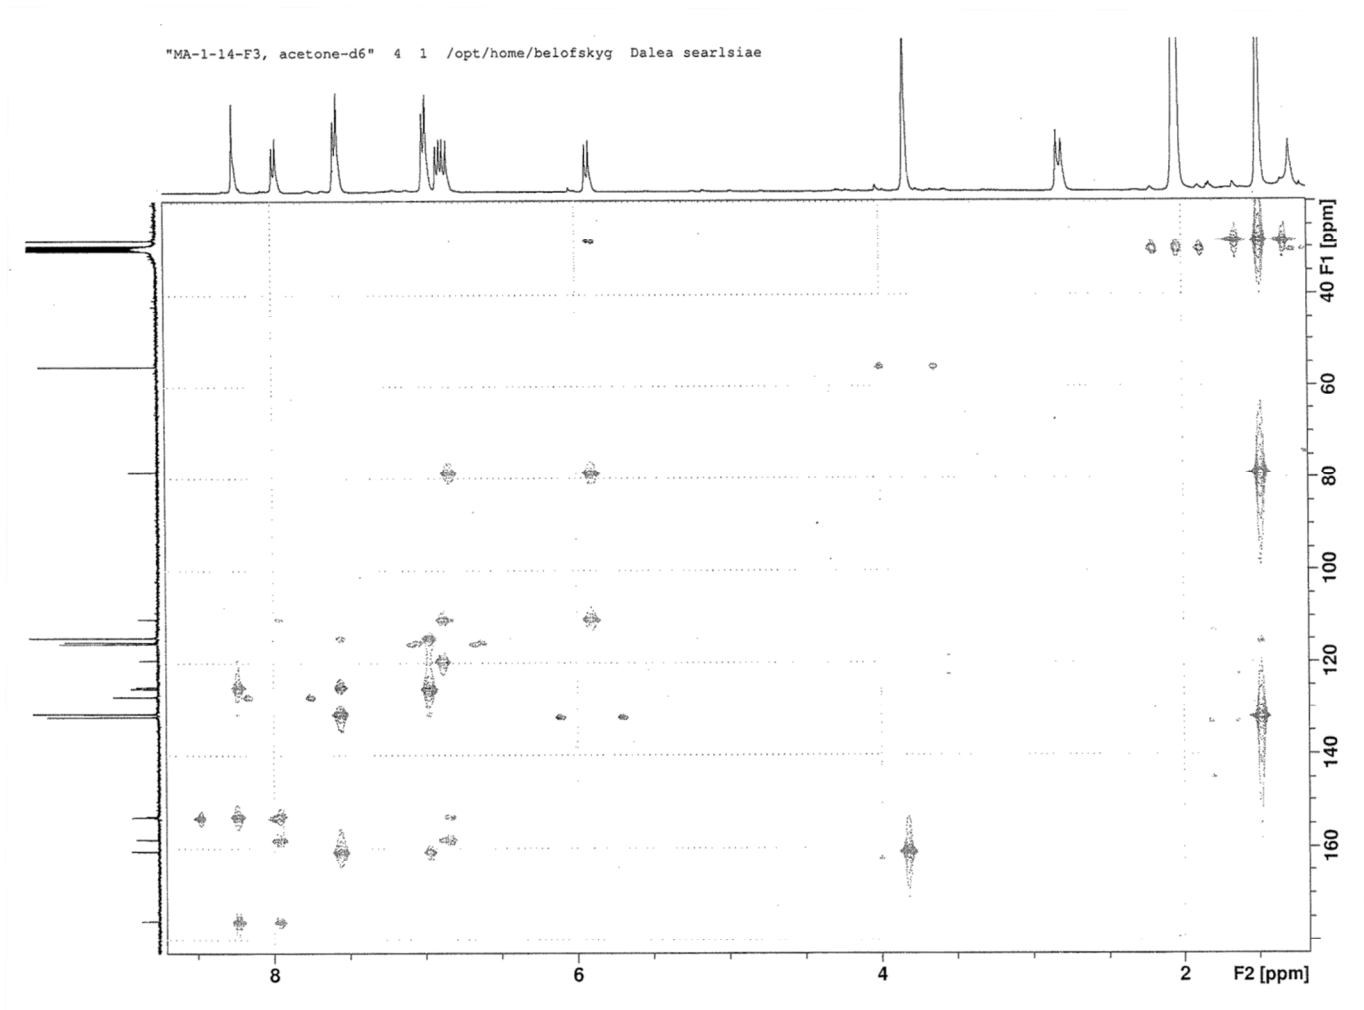

**Figure S48.** HMBC spectrum of calopogonium isoflavone A (**10**) (400 MHz; acetone- $d_6$ ).
